Britton and Yovanno *et al.* “Conformational changes in the essential *E. coli* septal cell wall synthesis complex suggest an activation mechanism”

1 **Conformational changes in the essential *E. coli* septal cell wall**  
2 **synthesis complex suggest an activation mechanism**

3  
4 Brooke M. Britton<sup>1\*</sup>, Remy A. Yovanno<sup>1\*</sup>, Sara F. Costa<sup>2</sup>, Joshua McCausland<sup>1</sup>, Albert Y. Lau<sup>1</sup>,  
5 Jie Xiao<sup>1#</sup>, Zach Hensel<sup>2#</sup>

6 1. Department of Biophysics and Biophysical Chemistry, Johns Hopkins School of Medicine,  
7 725 N. Wolfe St, Baltimore, MD, 21205, U.S.A.

8 2. ITQB NOVA, Universidade NOVA de Lisboa, Lisbon, Av. da República, 2780-157 Oeiras,  
9 Portugal.

10 \*: These two authors contributed equally

11 #: Correspondences should be addressed to [xiao@jhmi.edu](mailto:xiao@jhmi.edu) and [zach.hensel@itqb.unl.pt](mailto:zach.hensel@itqb.unl.pt)

12

Britton and Yovanno *et al.* “Conformational changes in the essential *E. coli* septal cell wall synthesis complex suggest an activation mechanism”

13 **ABSTRACT**

14 The bacterial divisome, a macromolecular machine that is composed of more than thirty  
15 proteins in *E. coli*, orchestrates the essential process of cell wall constriction during cell division.  
16 Novel antimicrobial strategies can target protein-protein interactions within the divisome and will  
17 benefit from insights into divisome structure and dynamics. In this work, we combined structure  
18 prediction, molecular dynamics simulation, single-molecule imaging, and mutagenesis to  
19 construct a model of the core complex of the *E. coli* divisome composed of the essential septal  
20 cell wall synthase complex formed by FtsW and FtsI, and its regulators FtsQ, FtsL, FtsB, and  
21 FtsN. We observed extensive interactions in four key regions in the periplasmic domains of the  
22 complex. FtsQ, FtsL, and FtsB scaffold FtsI in an extended conformation with the FtsI  
23 transpeptidase domain lifted away from the membrane through interactions among the C-  
24 terminal domains. FtsN binds between FtsI and FtsL in a region rich in residues with  
25 superfission (activating) and dominant negative (inhibitory) mutations. Mutagenesis experiments  
26 *in cellulo* and *in silico* revealed that the essential domain of FtsN functions as a tether to tie FtsI  
27 and FtsL together, impacting interactions between the anchor-loop of FtsI and the putative  
28 catalytic region of FtsW, suggesting a mechanism of how FtsN activates the cell wall synthesis  
29 activities of FtsW and FtsI.

Britton and Yovanno *et al.* “Conformational changes in the essential *E. coli* septal cell wall synthesis complex suggest an activation mechanism”

## 30 INTRODUCTION

31 Bacterial cell division is an essential process frequently targeted by antibiotics <sup>1,2</sup>. The  
32 cytoskeletal protein FtsZ defines the future division site <sup>3</sup> and recruits more than thirty proteins,  
33 many of them cell-wall enzymes and regulators. Collectively termed the divisome <sup>4,5</sup>, these  
34 proteins orchestrate cell wall constriction during cell division. In *E. coli*, the essential septal  
35 peptidoglycan (sPG) polymerase FtsW and its cognate transpeptidase FtsI form the sPG  
36 synthase complex FtsWI and cooperate to synthesize new septal cell wall <sup>6,7</sup>. Their activities are  
37 regulated by a conserved subcomplex of transmembrane proteins FtsQ, FtsL, and FtsB  
38 (FtsQLB) <sup>8-11</sup>, and by FtsN in  $\gamma$ -proteobacteria <sup>12</sup>. However, how the septal cell wall synthesis  
39 activities of FtsWI are regulated by FtsQLB and FtsN remains unclear.

40 In *E. coli*, FtsN has been regarded as the trigger of septum synthesis, as its arrival at the  
41 division site coincides with the initiation of cell-wall constriction <sup>12</sup>. FtsN and FtsN-like proteins  
42 are conserved in  $\gamma$ -proteobacteria and contain SPOR domains that bind denuded glycans <sup>13</sup>. In  
43 *E. coli*, an essential, periplasmic segment of FtsN (FtsN<sup>E</sup>) is sufficient to initiate constriction in  
44 the absence of full-length FtsN <sup>12,14,15</sup>. Our recent single-molecule studies show that FtsN<sup>E</sup> is  
45 part of a processive sPG synthesis complex with active FtsWI and required to maintain the  
46 processivity of the FtsWI complex <sup>16,17</sup>. Whether FtsQLB is also part of this complex and, if so,  
47 how it associates with FtsWI, is unknown. *In vitro* experiments using purified proteins found that  
48 *E. coli* FtsQLB inhibits FtsI activity <sup>18</sup>, while *Pseudomonas aeruginosa* FtsQLB enhances FtsW  
49 activity <sup>8</sup>. In neither case did the addition of FtsN impact FtsI or FtsW activity. *In vivo* genetic  
50 experiments showed that mutations in FtsL, FtsW and FtsI can be either dominant negative  
51 (DN) or superfission (SF, bypassing FtsN and/or complementing DN mutations) <sup>8,9,14,19,20</sup>. These  
52 seemingly contradictory observations suggest that FtsWI can transition between “on” and “off”  
53 states depending on the environment and/or genetic mutations, and that FtsQLB and FtsN may  
54 play important roles in shifting FtsWI between the two states <sup>9,10,19</sup>. However, it is unclear what  
55 conformations of FtsWI correspond to the “on” and “off” states and how FtsN shifts FtsWI  
56 between the two states.

57 A recent review synthesized evidence to date and used structure predictions to propose  
58 a model of allosteric regulation of FtsWI, in which multiple interactions cooperatively stabilize an  
59 active conformation <sup>21</sup>. This work drew on structure predictions of complexes FtsWI, FtsQLB,  
60 and FtsLWI using AlphaFold2 (AF2) <sup>22</sup>. Structure prediction was also recently applied to other  
61 divisome interactions <sup>19,23</sup>. While AF2 makes predictions that are largely consistent with

Britton and Yovanno *et al.* “Conformational changes in the essential *E. coli* septal cell wall synthesis complex suggest an activation mechanism”

62 available structural data and can accurately predict protein-protein interfaces<sup>24-26</sup>, its predictions  
63 can fail to distinguish between different states of the same complex<sup>27</sup> or describe the  
64 consequences of point mutations<sup>28</sup>.

65 In this work, we provided experimental evidence to show that FtsQLB forms a complex  
66 with active FtsWI *in vivo* and conducted structure predictions for *E. coli* FtsWI, FtsWI in complex  
67 with FtsQLB (FtsQLBWI), and for FtsQLBWI in complex with FtsN<sup>E</sup> (FtsQLBWIN). We subjected  
68 these predicted structures to all-atom molecular dynamics (MD) simulations to test the stability  
69 of predicted protein-protein interfaces. We observed extensive interactions in the membrane  
70 and periplasmic domains of the FtsQLBWI and FtsQLBWIN complexes. We then carried out  
71 mutagenesis and single-molecule tracking experiments to investigate these observed  
72 interactions. Further MD simulations using DN and SF point mutations revealed critical  
73 conformational changes at FtsQLB-FtsI protein-protein interfaces and near the putative catalytic  
74 region of FtsW. Collectively, our results support a model in which FtsQLB scaffolds FtsWI in an  
75 extended conformation poised for activation, and that FtsN<sup>E</sup> functions as a tether to tie FtsI and  
76 FtsL together to impact the interactions between the anchor-loop of FtsI and the catalytic region  
77 of FtsW, constituting an activation mechanism of FtsWI by FtsN.

## 78 RESULTS

### 79 Single-molecule tracking suggests that FtsQLB remains in complex with FtsWI on 80 both FtsZ and sPG tracks

81 Previously, using single-molecule tracking, we showed that FtsWI exhibits two  
82 directionally moving subpopulations that reflect their activities in sPG synthesis<sup>16,29</sup>: a fast-  
83 moving subpopulation (~30 nm/s) driven by FtsZ treadmilling dynamics and inactive in sPG  
84 synthesis (on the “Z track”), and a slow-moving subpopulation (~8 nm/s) independent of FtsZ  
85 treadmilling and driven by active sPG synthesis (on the “sPG track”). We later observed that  
86 FtsN exhibits only the slow-moving dynamics, indicating its association with FtsWI in a  
87 processive sPG synthesis complex on the sPG track<sup>17</sup>. To investigate whether FtsQLB is part  
88 of the processive, active complex on the sPG track and/or part of the inactive complex on the Z  
89 track, we ectopically expressed a Halo-FtsB fusion protein that complemented an FtsB depletion  
90 strain (**Fig. S1A, Table S1, S7**). We sparsely labeled Halo-FtsB with a fluorescent dye, JF646,  
91 and performed single-molecule tracking as we previously described<sup>16</sup>.

Britton and Yovanno *et al.* “Conformational changes in the essential *E. coli* septal cell wall synthesis complex suggest an activation mechanism”

92 We observed that a large percentage of single Halo-FtsB molecules exhibited directional  
93 motion ( $53.7\% \pm 2.7\%$ ,  $\mu \pm \text{s.e.m.}$ ,  $n = 379$  segments) (**Fig. 1B**, top, **Movie S1**, and **Movie S2**).  
94 The velocity distribution of directional segments of Halo-FtsB single-molecule trajectories was  
95 best described as the sum of fast- and slow-moving subpopulations ( $v_{fast} = 32.9 \pm 5.2$  nm/s,  $v_{slow}$   
96  $= 8.2 \pm 1.7$  nm/s,  $p_{fast} = 38\% \pm 13\%$ ,  $\mu \pm \text{s.e.m.}$ ,  $n = 179$  segments, **Fig. 1B**, bottom, **S1B**, and  
97 **Table S2**). In the presence of fosfomycin, a drug that inhibits the synthesis of FtsW substrate  
98 Lipid II, Halo-FtsB shifted to the fast-moving subpopulation ( $v_{fast} = 28.5 \pm 2.9$  nm/s,  $v_{slow} = 8.5 \pm$   
99  $3.0$  nm/s,  $p_{fast} = 70\% \pm 10\%$ ,  $\mu \pm \text{s.e.m.}$ ,  $n = 218$  segments, **Fig. 1B**, **S1C**, and **Table S2**). The  
100 existence of two subpopulations of FtsB and the response to fosfomycin (**Fig. 1B**, **S1B**, **C**, and  
101 **Table S2**) mirrored observations for FtsW in our previous study<sup>16</sup>, but differed from those of  
102 FtsN, which exhibited only slow motion<sup>17</sup>. Since FtsQ, FtsL, and FtsB form a stable heterotrimer  
103<sup>30</sup>, these observations suggest that FtsQLB is in complex with both fast-moving, inactive FtsWI  
104 on the Z track<sup>16</sup> and slow-moving, active FtsWI on the sPG track, with the latter also including  
105 FtsN<sup>17</sup>. As such, FtsWI in complex with FtsQLB may be able to adopt both active and inactive  
106 states, which are regulated by FtsN.

107 **An FtsQLBWI model describes an extended conformation of FtsI and extensive**  
108 **protein-protein interfaces**

109 To gain insight into how the conformation of FtsWI can adopt both active and inactive  
110 states for sPG synthesis in the FtsQLBWI complex, we used the ColabFold<sup>31</sup> implementation of  
111 AlphaFold2 (AF2)<sup>22</sup> to predict the atomic structure of FtsQLBWI. In the prediction, we did not  
112 utilize template coordinates, avoiding explicit dependence on homologous published structures.  
113 The predicted structure of the complex showed an extended conformation of FtsI supported by  
114 interactions between the membrane-distal C-terminal domains of FtsQ, FtsL, FtsB, and FtsI, as  
115 well as interactions between transmembrane helices (TMH) of FtsL, FtsB, FtsW, and FtsI.  
116 These interactions were predicted with high local confidence (pLDDT) except for extreme  
117 terminal residues that have no predicted interactions (**Fig. S2A**). Furthermore, predicted DockQ  
118 values<sup>32</sup> for protein-protein interfaces with individual subunits ranged from 0.64 to 0.73 (**Table**  
119 **S3**), indicating accurate predictions of protein complexes<sup>26</sup>. Finally, predictions for homologous  
120 complexes of FtsQLBWI in other diderm (gram negative) and monoderm (gram positive)  
121 species were largely similar, with notable differences at less conserved C-terminal domains,  
122 such as the different interactions reported for PASTA domains in FtsI homologs *Bacillus subtilis*  
123 Pbp2B<sup>33</sup> and *Streptococcus pneumoniae* Pbp2X<sup>34</sup> (**Fig. S2B**). These results show that AF2 can  
124 accurately predict protein-protein interfaces of *E. coli* FtsQLBWI and homologous complexes,

Britton and Yovanno *et al.* “Conformational changes in the essential *E. coli* septal cell wall synthesis complex suggest an activation mechanism”

125 but it remains essential to verify that predictions are consistent with experimental data and  
126 predictive in new experiments.

127 Next, we built a system of FtsQLBWI in a lipid bilayer (simulation details in **Table S4**)  
128 and performed a 1- $\mu$ s all-atom molecular dynamics (MD) simulation to investigate the stability  
129 and conformational dynamics of the complex. We excluded cytoplasmic, N-terminal regions of  
130 FtsQ (residues 1–19), FtsW (1–45), and FtsI (1–18) on the basis of having very low pLDDT  
131 and/or lacking high-confidence predicted protein-protein interactions. The MD simulation  
132 revealed a dynamic complex, with the FtsI transpeptidase (TPase) domain tilting backward and  
133 the head domain wrapping around the FtsL helix (**Fig. 1C, S3** and **Movie S3**). Unless otherwise  
134 noted, we describe and depict structures after 1  $\mu$ s of MD. Throughout the complex, we  
135 observed extensive interactions reported in previous experimental studies, such as leucine-  
136 zipper-like interactions between FtsL and FtsB helices<sup>35</sup> (**Fig. S4A**), and interactions between  
137 the same FtsW and FtsI transmembrane helices observed for the paralog RodA-PBP2<sup>36,37</sup> (**Fig.**  
138 **S4B**). The resulting complex is also consistent with crystal structures of *E. coli* FtsI (**Fig. S5A**)<sup>38</sup>  
139 and a partial FtsQ-FtsB complex (**Fig. S5B**)<sup>39</sup>.

140 To describe observed new interfaces in the context of previously defined domains, we  
141 define four periplasmic interaction regions in FtsQLBWI (**Fig. 1C**, dashed boxes). These include  
142 a “Truss” region that links FtsQ to FtsI via an extended  $\beta$  sheet, a “Hub” region that contains a  
143 dense interaction network on both sides of FtsL and FtsB helices, a “Lid” region in which the  
144 anchor domain of FtsI interacts with FtsW ECL4 (extracellular loop 4 containing the putative  
145 catalytic residue FtsW<sup>D297</sup><sup>40</sup>), and a “Pivot” region that resides between a short helix after the  
146 FtsI TMH and the second helix of FtsW ECL4. FtsI is involved in all four regions, contacting FtsL  
147 and FtsB in the membrane-distal periplasmic space and FtsW in the membrane, but essentially  
148 has no interaction with FtsQ. As we describe in detail below, these four regions are rich in  
149 residues that, when mutated, give rise to superfission (SF) or dominant negative (DN)  
150 phenotypes, suggesting that they modulate FtsWI activity.

### 151 **A collapsed structural model of FtsWI in the absence of FtsQLB reveals critical** 152 **interactions in the Pivot region**

153 Our FtsQLBWI model and FtsW, FtsN, and FtsB single-molecule tracking results  
154 suggest that FtsQLB forms a complex with FtsWI on the Z track that is poised for further  
155 activation by FtsN on the sPG track. To investigate this possibility, we performed MD simulation  
156 of an FtsWI system without FtsQLB. This simulation showed a major conformational change of

Britton and Yovanno *et al.* “Conformational changes in the essential *E. coli* septal cell wall synthesis complex suggest an activation mechanism”

157 FtsI periplasmic domains in the absence of FtsQLB. FtsI rotated about the Pivot region and  
158 collapsed onto the membrane, where it remained until the end of the 1- $\mu$ s simulation (**Fig. 1D**  
159 and **Movie S4**). Collapsed conformations of PBP2, the FtsI paralog in cell-elongation, were  
160 previously observed in cryo-EM imaging and a crystal structure of RodA-PBP2<sup>37</sup> (**Fig. S5C**). In  
161 the FtsQLBWI structure, the Pivot region consists of an FtsI helix (FtsI<sup>D51-S61</sup>) on top of the  
162 second short helix (FtsW<sup>S260-G274</sup>) of FtsW ECL4 and is maintained by hydrogen bonding  
163 between FtsI<sup>R60</sup>-FtsW<sup>Q266</sup> (**Fig. S6A**) and hydrophobic contact between FtsI<sup>L53</sup> and FtsW<sup>M269</sup>  
164 (**Fig. 1E** and **S7A**). These contacts were broken in FtsWI in the absence of FtsQLB, as seen in  
165 an increased distance between FtsI<sup>L53</sup> and FtsW<sup>M269</sup>, and between FtsI<sup>R60</sup> and FtsW<sup>Q266</sup> in the  
166 FtsWI trajectory (**Fig. 1F, S6B, and S7B**). Previous work showed that mutations to charged  
167 residues in this interface (FtsI<sup>G57D</sup>, FtsW<sup>M269K</sup>) lead to the failure of cell wall constriction, while  
168 replacing with a hydrophobic residue (FtsW<sup>M269I</sup>) produced a SF variant of FtsW<sup>19,20,41</sup>. As the  
169 Pivot region conformation is impacted by distal interactions with FtsQLB and contains both DN  
170 and SF mutations, it is likely key for regulating FtsWI activity.

171 **Truss region interactions stabilize an extended conformation of FtsI**

172 ***Extreme C-terminal segments of FtsQLBI form an extended  $\beta$ -sheet***

173 To identify what specific interactions between FtsI and FtsQLB support the extended  
174 conformation of FtsI periplasmic domains, we examined the Truss region. The Truss region  
175 consists of the C-terminal domains of FtsQLB and FtsI, with a striking feature that each one of  
176 the four proteins contributes one  $\beta$ -strand to form a continuous  $\beta$ -sheet extending from the end  
177 of an FtsQ  $\beta$ -sheet (**Fig. 1C** and **2A**). The  $\beta$ -sheet formed between FtsQ<sup>A252-A257</sup> ( $\beta$ 12) and  
178 FtsB<sup>T83-P89</sup> ( $\beta$ 1) has been previously reported<sup>42</sup> (**Fig. S5B**), but that between FtsL<sup>N116-Q120</sup> ( $\beta$ 1)  
179 and FtsI<sup>E575-I578</sup> ( $\beta$ 16) has not been observed experimentally and was only recently identified by  
180 structure prediction<sup>43</sup>. FtsL indirectly interacts with FtsQ via FtsB within this  $\beta$ -sheet. The  $\beta$ -  
181 strand of FtsL<sup>N116-Q120</sup> maintains  $\beta$  dihedral angles throughout the 1- $\mu$ s simulation, while FtsI<sup>E575-</sup>  
182 <sup>I578</sup>, which terminates the  $\beta$ -sheet, exhibits greater flexibility (**Fig. S8A, B**). Previously, it was  
183 reported that the FtsI C-terminus (FtsI<sup>I578-S588</sup>) was cleaved, although it was unclear whether the  
184 cleavage occurred post-translationally, or during protein purification<sup>44,45</sup>. We performed an  
185 additional 200-ns MD simulation of FtsQLBWI <sup>$\Delta$ I578-S588</sup> and observed that this truncation did not  
186 disrupt  $\beta$ -strand formation of FtsI<sup>E575-V577</sup> or FtsL<sup>N116-Q120</sup> (**Fig. S8C, D**). In addition to the  $\beta$ -sheet  
187 linking these four proteins, two important contacts were observed between FtsI<sup>R559</sup> and FtsL<sup>E115</sup>,

Britton and Yovanno *et al.* “Conformational changes in the essential *E. coli* septal cell wall synthesis complex suggest an activation mechanism”

188 and between FtsI<sup>R239</sup> and FtsQ<sup>D249</sup>, further strengthening C-terminal interactions between FtsI  
189 and FtsQLB (**Fig. S9, S10, and S11**).

### 190 ***β-strands deletions of FtsL and FtsI lead to varied degrees of defective cell division***

191 To verify the importance of the β-sheet formed between FtsL and FtsI, we constructed  
192 three FtsL mutants with varied degrees of C-terminal truncations (FtsL<sup>Δ6</sup>, FtsL<sup>Δ11</sup>, and FtsL<sup>Δ16</sup>).  
193 All three lack the C-terminal β-strand, and FtsL<sup>Δ11</sup> and FtsL<sup>Δ16</sup> additionally lack residues such as  
194 FtsL<sup>E115</sup> that interact with FtsI (**Fig. 2B and S12**). FtsL<sup>Δ6</sup> and FtsL<sup>Δ11</sup> cells were filamentous,  
195 indicating a division defect, but complemented an FtsL depletion strain at the highest induction  
196 level tested (100 μM IPTG). FtsL<sup>Δ16</sup> cells remained filamentous and failed to rescue cell division  
197 under the same condition (**Fig. 2C, S13A, B, and Table S5**). Fluorescently labeled FtsL<sup>Δ6</sup> and  
198 FtsL<sup>Δ11</sup> (mVenus-FtsL) fusions showed clear, but significantly reduced, midcell localization,  
199 while mVenus-FtsL<sup>Δ16</sup> cells exhibited only diffusive, cytoplasmic fluorescence (**Fig. 2D and**  
200 **S13C, D**). These results suggest that the interactions of the C-terminal β-strand of FtsL with  
201 FtsB and FtsI are critical for FtsL midcell recruitment and, consequently, cell division. These  
202 results are consistent with a previous C-terminal truncation mutant FtsL<sup>Δ114-121</sup> (or FtsI<sup>Δ7</sup>), which  
203 complemented FtsL depletion but was defective in co-immunoprecipitating with FtsQ<sup>46</sup> and  
204 produced wrinkled colonies<sup>47</sup>.

205 Next, to investigate the role of β-strand interaction between FtsL and FtsI, we  
206 constructed two FtsI C-terminal truncations, FtsI<sup>ΔN579-S588</sup> (or FtsI<sup>Δ10</sup>), where only the disordered  
207 C-terminus after the predicted β-strand was deleted, and FtsI<sup>ΔE575-S588</sup> (or FtsI<sup>Δ14</sup>), where the β-  
208 strand and the C-terminus were both deleted (**Fig. 2B, S12, and Table S6**). We note that  
209 reported post-translational cleavage of FtsI to FtsI<sup>I578-S588</sup> would be FtsI<sup>Δ11</sup> following this  
210 nomenclature, removing one residue with a hydrophobic sidechain from the predicted β-strand.  
211 Both FtsI<sup>Δ10</sup> and FtsI<sup>Δ14</sup> complemented FtsI depletion (**Fig. S14A**). FtsI<sup>Δ10</sup> cells were longer ( $l =$   
212  $5.5 \pm 1.3, \mu \pm \text{s.e.m.}$  calculated from two biological replicates for  $n = 1689$  total cells) than wild-  
213 type cells ( $l = 3.9 \pm 0.0, \mu \pm \text{s.e.m.}$ ,  $n = 1233$  cells) at the minimum expression level, suggesting  
214 that removing C-terminal FtsI residues reduces FtsWI activity (**Table S6**). However, extending  
215 the truncation in FtsI<sup>Δ14</sup> corrected this defect, resulting in cell lengths marginally shorter than  
216 wild-type ( $l = 3.3 \pm 0.0, \mu \pm \text{s.e.m.}$ ,  $n = 487$  cells) at the minimum expression level (**Fig. 2E,**  
217 **S14B, and Table S6**). Western blot did not indicate any change in expression and/or stability for  
218 truncated FtsI (**Fig. S14C**). These observations indicate that interactions between C-terminal β-  
219 strands of FtsI and FtsL may be inhibitory. The deletion of disordered FtsI residues following the



Britton and Yovanno *et al.* “Conformational changes in the essential *E. coli* septal cell wall synthesis complex suggest an activation mechanism”

220  $\beta$ -strand (FtsI <sup>$\Delta$ 10</sup>) may reduce the entropic cost of  $\beta$ -sheet formation, whereas further truncation  
221 into  $\beta$ -strand residues (FtsI <sup>$\Delta$ 14</sup> and possibly FtsI <sup>$\Delta$ 11</sup>) relieves the inhibitory effect.

## 222 **Hub region interactions reveal inhibitory and activating interactions between FtsL** 223 **and FtsI**

224 The Hub region lies beneath the Truss region, encompassing the previously identified  
225 CCD interface (Constriction Control Domain, containing multiple SF residues<sup>8,9,48</sup>) on one side  
226 of FtsL and FtsB helices (**Fig. 3A** and **S15**), and the AWI interface (Activation of FtsW and FtsI,  
227 containing multiple DN residues<sup>49</sup>) on the other side (**Fig. 3B**). As such, the Hub region may be  
228 a key regulatory region for the activities of FtsWI. We analyzed predicted interactions in the Hub  
229 region that were maintained during the final 500 ns of a 1- $\mu$ s simulation of the FtsQLBWI system,  
230 focusing on hydrogen bonds (as defined in **Methods**) and hydrophobic contacts monitored by  
231 computing the distance between the side chain geometry center of each residue in a given pair.

232 The most prominent feature in the CCD interface of the Hub region is a network of  
233 residues with polar sidechains extending through FtsQLB to FtsI. As shown in **Fig. 3A**, contacts  
234 between FtsQ<sup>R196</sup>-FtsB<sup>E69</sup>, FtsQ<sup>R196</sup>-FtsB<sup>E56</sup> and FtsQ<sup>R213</sup>-FtsB<sup>E56</sup> connect FtsQ to FtsB. FtsB is  
235 connected to FtsL through FtsB<sup>E56</sup>-FtsB<sup>R70</sup> and FtsB<sup>R70</sup>-FtsL<sup>E88</sup>. Finally, FtsL connects to FtsI  
236 through FtsL<sup>R82</sup>-FtsI<sup>S85</sup> (**Fig. 3A** and **S16**). Mutations of a few residues in this region, FtsB<sup>E56A</sup>,  
237 FtsL<sup>E88K</sup>, FtsL<sup>N89S</sup>, FtsL<sup>G92D</sup>, and FtsL<sup>H94Y</sup>, have been reported to be SF variants: cells expressing  
238 these variants are shorter than wild-type cells and able to survive in the absence of FtsN<sup>9,14</sup>.  
239 Therefore, it is possible that these interactions maintain FtsI in an inactive conformation, and  
240 that abolishing these inhibitory interactions activates FtsI.

241 Interactions in the AWI interface are mainly between one face of the FtsL helix and two  
242  $\beta$ -strands at the neck of the FtsI head domain (**Fig. 3B**). A few hydrophobic residues, FtsI<sup>Y168</sup>,  
243 FtsI<sup>V84</sup>, and FtsI<sup>V86</sup>, pack closely with hydrophobic residues FtsL<sup>I85</sup> and FtsL<sup>L86</sup>. Additionally,  
244 hydrogen bonds were observed between FtsL<sup>R82</sup>-FtsI<sup>S85</sup> and between FtsL<sup>N83</sup>-FtsI<sup>P87</sup> (**Fig. S16**).  
245 Previously both FtsL<sup>R82E</sup> and <sup>L86F</sup> have been identified as DN mutants, suggesting that these  
246 interactions may be required for maintaining the active conformation of FtsI.

## 247 **MD simulations of FtsI<sup>R167S</sup> SF variant supports an active conformation of FtsI**

248 We reasoned that if predicted inhibitory interactions in the CCD region and activating  
249 interactions in the AWI region play important roles in modulating FtsI activity, we may observe  
250 corresponding conformational changes in the Hub region when some of these residues are

Britton and Yovanno *et al.* “Conformational changes in the essential *E. coli* septal cell wall synthesis complex suggest an activation mechanism”

251 mutated. To examine interactions in the AWI region, we performed a 1- $\mu$ s MD simulation of a  
252 SF variant, FtsI<sup>R167S</sup> <sup>16</sup> (**Fig. S17A**). FtsI<sup>R167</sup> is next to hydrophobic residues FtsI<sup>Y168</sup>, FtsI<sup>V84</sup>, and  
253 FtsI<sup>V86</sup> that interact with FtsL<sup>I85</sup> and FtsL<sup>L86</sup> (**Fig. 3B**). In the FtsI<sup>R167S</sup> simulation, the two  $\beta$ -  
254 strands at the neck of the FtsI head domain pack closer to FtsL than in the WT (FtsQLBWI)  
255 simulation, as measured by the sidechain geometry center distances between FtsI<sup>V84</sup> and FtsL<sup>I85</sup>  
256 (**Fig. 3C, D, and S18A, B**;  $d = 6.4 \pm 0.6$  Å for WT and  $5.4 \pm 0.5$  Å for FtsI<sup>R167S</sup> complex).

257 Interestingly, we observed drastic conformational changes in the turn connecting the two  
258 FtsL helices immediately above the AWI region of the Hub. As shown in **Fig. 3E**, this  
259 conformational change corresponds to a transition in the distribution of dihedral angles for  
260 FtsL<sup>G92</sup> and with FtsL<sup>H94</sup> shifting from  $\alpha$ -helical to  $\beta$ -strand dihedral angles, while the WT  
261 complex retains  $\alpha$ -helical dihedral angles. Note that both FtsL<sup>H94Y</sup> and FtsL<sup>G92D</sup> are SF variants,  
262 suggesting that the conformation of this region plays an important role in FtsWI regulation.  
263 Taken together, the FtsI<sup>R167S</sup> SF complex simulation suggests that replacing the charged  
264 arginine residue with uncharged serine in FtsI<sup>R167S</sup> strengthens hydrophobic interactions  
265 between FtsI and FtsL in the AWI region and results a conformational change in FtsL helices.  
266 These changes may correspond to an activated conformation of FtsWI, leading to the SF  
267 phenotype of FtsI<sup>R167S</sup>.

### 268 ***FtsB remains associated with FtsWI in the FtsI<sup>R167S</sup> SF background***

269 In our previous single-molecule tracking experiments, we observed that FtsWI shifts to  
270 the slow-moving, active population on the sPG track in the FtsB<sup>E56A</sup>, FtsI<sup>R167S</sup>, and FtsW<sup>E289G</sup> SF  
271 backgrounds <sup>16</sup>. We asked whether activation of FtsWI was due to the dissociation of FtsQLB  
272 from FtsWI on the Z track to relieve an inhibitory effect as previously proposed <sup>18</sup>, or continued  
273 association of FtsQLB with activated FtsWI on the sPG track to maintain its activities as recently  
274 suggested in an *in vitro* study <sup>8</sup>. To distinguish between these two possibilities, we performed  
275 single-molecule tracking of Halo-FtsB in the FtsI<sup>R167S</sup> SF background under a rich growth  
276 condition, which was previously used to assess the effect on FtsW. As shown in **Fig. 3F**, we  
277 observed that Halo-FtsB was best fit as a single, slow-moving, active population ( $v_{slow} = 8.0 \pm$   
278  $0.4$  nm/s,  $\mu \pm$  s.e.m.,  $n = 112$  segments, **Table S2**), just as we previously observed for FtsW.  
279 This result is consistent with the expectation that FtsI<sup>R167S</sup> strengthens the interactions between  
280 FtsI and FtsL and that FtsQLB remains in the complex with activated FtsWI, similar to FtsN <sup>17</sup>.

Britton and Yovanno *et al.* “Conformational changes in the essential *E. coli* septal cell wall synthesis complex suggest an activation mechanism”

## 281 **Lid region reveals important interactions between the FtsI anchor domain and** 282 **FtsW ECL4**

### 283 ***Position of FtsI anchor domain may modulate FtsW activity***

284 The Lid region is located at the periplasmic face of the inner membrane and involves  
285 interactions between a polar patch on the back of FtsL and FtsB<sup>23</sup>, a loop in the FtsI anchor  
286 domain (FtsI anchor-loop) and FtsW ECL4 (**Fig. 4A, S19, and S20**). Specifically, hydrogen  
287 bonds between FtsB<sup>K23</sup>-FtsI<sup>E219</sup>, FtsB<sup>D35</sup>-FtsL<sup>R67</sup>, FtsL<sup>R67</sup>-FtsI<sup>D220</sup>, and FtsL<sup>E68</sup>-FtsI<sup>R207</sup> persist  
288 during the final 500 ns of FtsQLBWI simulation and fix the orientation of the FtsI anchor-loop  
289 with respect to the FtsL and FtsB helices (**Fig. 4A and S19**), while hydrogen bonding between  
290 FtsL<sup>R61</sup>, FtsW<sup>N283</sup>, and FtsW<sup>S284</sup> positions ECL4 directly beneath the anchor-loop (**Fig. 4B and**  
291 **S20**). These interactions allow FtsI<sup>Y214</sup> in the FtsI anchor-loop to hydrogen bond with FtsW<sup>E289</sup>,  
292 positioning FtsW ECL4 beside a central pore containing the putative catalytic residue FtsW<sup>D297</sup><sup>19</sup>  
293 (**Fig. 4B, C, and Fig. S20**). Previous genetic studies showed that FtsW<sup>E289G</sup> is a SF variant while  
294 FtsL<sup>R61E</sup> and FtsL<sup>R67E</sup> are DN variants<sup>23</sup>, indicating that altering the interactions in the Lid region  
295 can indeed render a constitutively active or inactive complex.

### 296 ***MD simulations of Lid region DN and SF complexes reveal drastically different*** 297 ***interactions***

298 Observing that Lid region interactions in FtsQLBWI are rich in SF and DN residues, we  
299 hypothesize that local conformational changes resulting from these mutations could shed light  
300 on the FtsW activation mechanism. We simulated the effects of introducing the FtsW<sup>E289G</sup> SF  
301 variant and the FtsL<sup>R61E</sup> DN variant into FtsQLBWI. Both complexes adopt similar global  
302 structures after 1  $\mu$ s of MD compared to WT FtsQLBWI (**Fig. S17B, C**), but differ in local  
303 positioning of the FtsI anchor-loop relative to FtsW ECL4 (**Fig. 4D, E**). In the SF FtsW<sup>E289G</sup>  
304 complex, the FtsI anchor-loop is rotated sideways toward FtsL and FtsW TMH1, opening a  
305 central cavity of FtsW (**Fig. 4D**). This conformation is stabilized by backbone hydrogen bonding  
306 between FtsI<sup>R213</sup> and FtsW<sup>L288</sup> in addition to maintaining contacts with FtsL (**Fig. S20**). In  
307 contrast, in the DN FtsL<sup>R61E</sup> complex, the FtsI anchor-loop is directly above the FtsW cavity (**Fig.**  
308 **4E**). This interaction is stabilized by contacts between FtsI<sup>R216</sup> and FtsW<sup>E289</sup> and persists  
309 through ~72% of the last 500 ns of simulation of the FtsL<sup>R61E</sup> DN complex (**Fig. S21**). As we  
310 described above, the FtsI anchor-loop is coordinated by its interactions with the polar patch on  
311 the back of FtsL and with FtsW ECL4, which are reduced in the FtsL<sup>R61E</sup> variant (**Fig. S17C**).  
312 Loss of the interaction between FtsL<sup>R61E</sup> and FtsI<sup>K219</sup> is also accompanied by conformational  
313 changes in FtsI; the relative orientation of FtsI and FtsW helices in the Pivot region changes,

Britton and Yovanno *et al.* “Conformational changes in the essential *E. coli* septal cell wall synthesis complex suggest an activation mechanism”

314 and the  $\beta$ -sheet in the anchor domain tilts towards FtsL (**Fig. S17C**). Lastly, we note that in the  
315 SF FtsW<sup>E289G</sup> simulation we observed FtsW TM7 tilt outward and expose a large  
316 extracytoplasmic cavity (**Fig. 4D** and **S17B**) as reported for the RodA-PBP2 complex<sup>37</sup>.

### 317 **Binding of FtsN<sup>E</sup> reduces inhibitory interactions and strengthens activating** 318 **interactions in the FtsQLBWI complex**

319 Previous studies have shown that the effects of SF variants are independent of FtsN, i.e.  
320 SF variants bypass the need for FtsN binding. Therefore, we reason that the binding of FtsN to  
321 the FtsQLBWI complex could switch the complex into an active conformation similar to what we  
322 observed in the SF variant complex. To investigate the role of FtsN binding, we predicted the  
323 structure of FtsQLBWI with the addition of FtsN<sup>K58-V108</sup>, which encompasses FtsN<sup>E</sup> (FtsN<sup>L75-Q93</sup>  
324 <sup>14</sup>) and a sufficient number of surrounding periplasmic residues required to obtain a predicted  
325 structure. As with other complexes, we performed 1  $\mu$ s of MD to investigate interactions and  
326 dynamics of the predicted complex of FtsQLBWI and FtsN<sup>K58-V108</sup> (FtsQLBWIN, **Movie S5**).

327 While termini of FtsN<sup>K58-V108</sup> did not form stable interactions on this timescale, the FtsN<sup>E</sup>  
328 region is bookended by two interfaces predicted with high confidence and stability in MD (**Fig.**  
329 **5A**). First, FtsN<sup>L75-P79</sup> forms a polyproline II helix that binds the FtsI head domain (**Fig. S22A**).  
330 This region consists of residues with high polyproline II helix propensity<sup>50</sup>, which is a property  
331 conserved for FtsN (**Fig. S22B**) in taxonomic families within the previously identified subgroups  
332 characterized by a four-amino-acid deletion in RpoB<sup>51,52</sup>. However, we did not identify this motif  
333 for FtsN outside of these subgroups (e.g. in *Pseudomonadaceae*) and predicted complexes with  
334 both *P. aeruginosa* FtsI and PBP3x did not include this interaction (**Fig. S22C**), suggesting that  
335 FtsN interactions and functions may vary between  $\gamma$ -proteobacteria. This observation is  
336 consistent with the conditional essentiality of FtsN and the inability to detect an effect of FtsN on  
337 FtsQLBWI or reconstitute FtsQLBWIN *in vitro* for *P. aeruginosa*<sup>8 53</sup>.

338 The second interaction region, FtsN<sup>W83-L89</sup>, contains conserved residues FtsN<sup>W83</sup>, FtsN<sup>Y85</sup>,  
339 and FtsN<sup>L89</sup>, which are also the most sensitive residues to alanine scanning mutagenesis<sup>14</sup>.  
340 This region interacts with both the AWI interface of FtsL (FtsL<sup>L86</sup>, FtsL<sup>A90</sup>) and at the neck of the  
341 FtsI head domain (FtsI<sup>V86</sup> and FtsI<sup>Y168</sup>), largely through hydrophobic interactions and also  
342 including FtsB<sup>L53</sup> (**Fig. 5A**, right). Importantly, the FtsL and FtsI residues bound by FtsN overlap  
343 with those impacted in the FtsI<sup>R167S</sup> SF variant (FtsL<sup>L86</sup>, FtsI<sup>V86</sup>, and FtsI<sup>Y168</sup>), suggesting a  
344 shared mechanism of FtsQLBWI activation. Furthermore, this FtsN-binding interface includes  
345 both FtsL<sup>A90</sup> in the hydrophobic interface and an FtsL<sup>E87</sup>-FtsN<sup>R84</sup> interaction, suggesting that DN

Britton and Yovanno *et al.* “Conformational changes in the essential *E. coli* septal cell wall synthesis complex suggest an activation mechanism”

346 variants FtsL<sup>E87K</sup> and FtsL<sup>A90E</sup> are defective in FtsN<sup>E</sup> binding. To validate the prediction of FtsN  
347 binding specificity, we additionally predicted structures of FtsN<sup>K58-V108</sup> together with only FtsQLB  
348 or FtsWI. Despite relatively low prediction confidence, the predicted location of FtsN<sup>W83-L89</sup>  
349 binding did not change (**Fig. S22D**). We also note that predictions of full-length FtsN are  
350 possible for *E. coli* and homologous complexes such as for *Aliivibrio fischeri*, but that we failed  
351 to identify other high-confidence binding interfaces (**Fig. S22E**).

352 Little global change was observed in simulations of FtsQLBWIN compared to FtsQLBWI  
353 (**Fig. S17D**). However, MD revealed that the presence of FtsN<sup>E</sup> triggered extensive local  
354 conformational changes in all four interaction regions in FtsQLBWI. In the Truss region, the  
355 FtsL<sup>E115</sup>-FtsI<sup>R559</sup> interaction was broken (**Fig. S9A** and **S10E**), which impacts interactions  
356 between the FtsL  $\beta$ -strand and adjacent FtsB and FtsI  $\beta$ -strands. Several interactions involving  
357 polar residues at the CCD interface (FtsL<sup>E98</sup>-FtsI<sup>R246</sup> and FtsL<sup>N89</sup>-FtsI<sup>P170</sup>) in the Hub region were  
358 nearly completely abolished (**Fig. S16**), resulting in conformational change for FtsL<sup>H94</sup> and  
359 FtsL<sup>G92</sup> similar to that observed for FtsQLBWI<sup>R167S</sup> (**Fig. 5B**). In the Lid region, charged  
360 interactions between the polar patch of FtsL and the back of the FtsI anchor domain (FtsL<sup>R67</sup>-  
361 FtsI<sup>D225</sup>, **Fig. 5C** and **S23**) are present; FtsW<sup>E289</sup> in ECL4 switches from interacting with FtsI<sup>Y214</sup>  
362 to FtsI<sup>R213</sup> in the anchor-loop, resulting in conformation changes in the FtsI anchor-loop and  
363 FtsW ECL4 that alter the catalytic cavity on the periplasmic face of FtsW relative to the  
364 conformer observed for FtsQLBWI (**Fig. 5D**). This conformational change, coincident with loss  
365 of FtsW<sup>E289</sup>-FtsI<sup>Y214</sup> interaction, is similar to that observed with the FtsW<sup>E289G</sup> SF mutation (**Fig.**  
366 **4D, S22F**). However, the same conformational change did not occur in the FtsI<sup>R167S</sup> simulation  
367 within 1  $\mu$ s and it remains unclear if this specific conformational change is necessary or  
368 sufficient for FtsW activation (**Fig. S22G**). In the FtsQLBWIN simulation, we also observed that  
369 FtsW<sup>K370</sup> flipped to form a salt bridge with FtsW<sup>D297</sup> within the first 200 ns that persisted to the  
370 end of the simulation (**Fig. 5D, Movie S5**). This was also observed in FtsI<sup>R167S</sup> and FtsW<sup>E289G</sup> SF  
371 simulations, but not in the wild-type FtsQLBWI simulation. The consistency between FtsN<sup>E</sup>-  
372 induced conformational changes and those that appeared in simulations of SF complexes with  
373 FtsI<sup>E289G</sup> or FtsI<sup>R167S</sup>, but not the wild-type FtsQLBWI or the DN FtsL<sup>R61E</sup> complex, suggests that  
374 FtsN<sup>E</sup> binding in the Hub region has allosteric effects on FtsW and/or FtsI activity in the  
375 FtsQLBWI complex.

### 376 Defining long-range interaction paths of FtsQLB complexes

377 Our analyses described above allow us to identify critical local interactions that are  
378 modulated by FtsN<sup>E</sup> binding and may contribute to the activation of FtsWI, but do not reveal how

Britton and Yovanno *et al.* “Conformational changes in the essential *E. coli* septal cell wall synthesis complex suggest an activation mechanism”

379 local interactions trigger distal conformational changes in the complex. To investigate this, we  
380 compared long-range interaction pathways for wild-type and two active (FtsI<sup>R167S</sup> or FtsN<sup>E</sup>)  
381 complexes, as well as for the FtsI<sup>R61E</sup> DN complex. We quantified correlations between pairs of  
382 residues using a dynamical network model<sup>54</sup>. Highly correlated residues in a simulation  
383 trajectory of a complex reflect their coordinated motions, allowing us to construct long-range  
384 interaction pathways. Because FtsQ is primarily connected to the rest of the complex through its  
385 interactions with FtsB in the C-terminal Truss region, and because we wish to identify long  
386 range interactions that affect the activities of FtsW and FtsI, we computed optimal paths through  
387 the Truss and Hub regions between FtsQ and putative catalytic residues FtsW<sup>D297</sup><sup>19</sup> and FtsI<sup>S307</sup>  
388 (**Fig. S24**). These paths reveal dominant routes of communication between the proteins. The  
389 optimal path ensemble between FtsQ and FtsW<sup>D297</sup> for the DN FtsI<sup>R61E</sup> simulation exhibits  
390 greater path density through FtsB, while the other simulation systems exhibit greater path  
391 density through FtsL (**Fig. 5E and Fig. S24A**). Interestingly, active FtsI<sup>R167S</sup> and especially  
392 FtsN<sup>E</sup> simulations included more FtsI residues in optimal paths connecting FtsI to FtsW, which  
393 is consistent with our observation that FtsN<sup>E</sup> binds between FtsL and the FtsI head domain in  
394 the Hub region to enhance this interaction. The optimal path ensemble between FtsQ and  
395 FtsI<sup>S307</sup> extends through SF residues including FtsB<sup>E56</sup>, FtsL<sup>E88</sup>, and FtsL<sup>H94</sup>, and varied across  
396 different complexes (**Fig. S24B**).

## 397 DISCUSSION

398 In this work, we first used single-molecule tracking to identify that *E. coli* FtsQLB forms a  
399 complex with both inactive FtsWI on the Z track and active FtsWI on the sPG track (**Fig. 1A, B**).  
400 Building upon this result, we used structure prediction and molecular dynamic simulations to  
401 model the structures of FtsQLBWI (**Fig. 1C**), FtsWI (**Fig. 1D**), and FtsQLBWIN (**Fig. 5A**). We  
402 then examined the structural models by a set of mutations both experimentally (**Fig. 2C–E and**  
403 **3F**) and computationally (**Fig. 3C–F, 4C, 5D–E**). Combining these structural models with  
404 observations from MD and in biological experiments, we propose a regulatory mechanism in  
405 which FtsWI's activities depend on FtsQLB and are further activated by FtsN in *E. coli*.

406 In the absence of FtsQLB, FtsWI adopts flexible conformations with low GTase and  
407 TPase activities because FtsWI lacks interactions in the Pivot and Lid regions that stabilize  
408 FtsWI conformations required for processive sPG strand polymerization and crosslinking. The  
409 addition of FtsQLB stabilizes an extended conformation of FtsI through the Truss region. This  
410 conformation supports higher FtsWI activities compared to the background level of FtsWI alone,

Britton and Yovanno *et al.* “Conformational changes in the essential *E. coli* septal cell wall synthesis complex suggest an activation mechanism”

411 and could be sufficient in species that are not dependent on FtsN. The binding of FtsN<sup>E</sup> both  
412 weakens inhibitory interactions in the CCD interface and enhances activating interactions in the  
413 AWI interface of the Hub region, collectively resulting in stronger association of the FtsI head  
414 domain and FtsL. These changes promote conformations in which interactions between the FtsI  
415 anchor-loop and FtsW ECL4 are modified to open the catalytic pore of FtsW. We propose that  
416 this conformational change corresponds to the highest activities of the complex because it  
417 remodels the catalytic cavity of FtsW to facilitate processive PG polymerization and to allow the  
418 growing PG strand to reach the TPase domain of FtsI.

419 Further, we hypothesize that binding of the nascent PG strand to FtsI may be coupled  
420 with transient conformational change to an extended conformation compatible with PG  
421 crosslinking as proposed for the RodA-PBP2 elongasome complex<sup>37</sup> and observed in our  
422 predicted structures (**Fig. S3**). This mechanism differs in specific details from those proposed in  
423 recent work that also drew from structure prediction<sup>21,43,53</sup>. Despite their differences, each of  
424 these hypotheses involves allostery linking periplasmic interactions to distal active sites.

#### 425 **Roles of FtsQLB in FtsWI activation**

426 The structural models of various complexes allowed us to clarify the seemingly  
427 contradictory roles of FtsQLB in activating FtsWI. Using a thioester substrate of FtsI, Boes *et al.*,  
428 found that adding purified *E. coli* FtsQ moderately inhibited FtsI TPase activity, while adding  
429 FtsL and FtsB had little effect<sup>18</sup>. Marmont *et al.*, found that purified *P. aeruginosa* FtsL and FtsB  
430 enhanced FtsW GTase activity as well as FtsQLB<sup>8</sup>. In neither case did the addition of FtsN  
431 impact FtsI or FtsW activity. Our model of FtsQLBWI shows that FtsQ has few interactions with  
432 members of the complex other than FtsB. Thus, a role of FtsQ is to stabilize the global  
433 conformation of the complex via these interactions without directly impacting the activity of FtsW  
434 or FtsI. The major role of FtsL and FtsB is to scaffold FtsWI in a conformation poised for  
435 activation by clamping both the membrane-distal TPase domain of FtsI and membrane-  
436 embedded FtsW. Truncations of  $\beta$ -strands in FtsL <sup>$\Delta$ 6</sup>, FtsL <sup>$\Delta$ 11</sup>, FtsL <sup>$\Delta$ 16</sup>, and FtsL <sup>$\Delta$ 10</sup> were not lethal,  
437 but resulted in filamentous phenotypes indicating defects in cell division. Stacked  $\beta$ -strands  
438 between FtsL, FtsB, and FtsQ are consistent with the observation that C-terminal truncation of  
439 FtsL <sup>$\Delta$ 100-121</sup> (or FtsL <sup>$\Delta$ 21</sup>) both abolishes FtsL interaction with FtsQ and also results in a reduced  
440 level of full length FtsB<sup>46</sup>. A cell-wall synthesis defect for FtsL <sup>$\Delta$ 10</sup>, but not for FtsL <sup>$\Delta$ 14</sup>, suggests a  
441 subtle, possibly inhibitory role for C-terminal FtsL-FtsI interaction in the Truss region and is  
442 consistent with the observation that deletion of FtsL<sup>G571-V577</sup> appears to be fully functional<sup>55</sup>.

Britton and Yovanno *et al.* “Conformational changes in the essential *E. coli* septal cell wall synthesis complex suggest an activation mechanism”

#### 443 **The proposed activation mechanism is consistent with previous studies**

444 The proposed activation mechanism is remarkably consistent with what was previously  
445 deduced by genetic studies: following recruitment by FtsQ, the activating signal goes from FtsB  
446 to FtsL, then to FtsI, and finally to FtsW<sup>9</sup>. We suggest that the final activation step includes  
447 remodeling the central cavity of FtsW to facilitate processive PG polymerization and crosslinking.  
448 This step can be achieved by multiple means: SF variants in the Pivot (such as FtsW<sup>M269I</sup>), Hub  
449 (such as FtsB<sup>E56A</sup>, FtsL<sup>H94Y</sup>, and FtsI<sup>R167S</sup>), and Lid (such as FtsI<sup>K211I</sup>) regions can correctly  
450 position the FtsI anchor domain away from the FtsW pore, or directly remodel the structure  
451 defined by the FtsI anchor-loop and FtsW ECL4 to open a channel in FtsW (such as FtsW<sup>E289G</sup>).  
452 However, short circuiting this pathway removes potential points of regulation needed to  
453 coordinate cell wall synthesis in space and time and in response to environmental conditions.

454 This activation mechanism is also consistent with previous mutagenesis studies, as our  
455 results provide unprecedented details in potential conformational changes caused by previously  
456 identified SF and DN mutants. For example, previously it was observed that substitutions  
457 removing the negative charge of FtsW<sup>E289</sup> do not affect the function of FtsW while only  
458 FtsW<sup>E289G</sup> is superfission<sup>19</sup>. This observation can be explained by the fact that the loss of the  
459 side chain at position FtsW<sup>289</sup>, but not necessarily specific interactions, removes the capping of  
460 the FtsW cavity and hence activating FtsW GTase activity. The observation that SF variant  
461 FtsW<sup>E289G</sup> or FtsW<sup>M269I</sup>, but not overexpression of FtsN, can rescue the double-DN mutant  
462 FtsL<sup>L86F/E87K</sup><sup>9</sup> is also consistent with our proposed activation mechanism and results. Since the  
463 double-DN mutant FtsL<sup>L86F/E87K</sup> loses its ability to bind to FtsN to trigger conformational changes  
464 that increase FtsWI activity via allosteric paths extending from the Hub through the Lid and Pivot  
465 regions (**Fig. 5E**), it is expected that Lid and/or Pivot mutations could short-circuit this effect.

466 The activation mechanism we propose does not specifically involve FtsWI catalytic  
467 residues. However, this model could be expanded to address possible regulation of active site  
468 conformation and dynamics near catalytic residues such as FtsW<sup>D297</sup><sup>19</sup>. For example, dynamics  
469 in the vicinity of FtsW<sup>D297</sup> revealed a potential role of FtsW<sup>K370</sup> in regulating FtsW activity (**Fig.**  
470 **5D**). In predictions, FtsW<sup>K370</sup> blocks a putative substrate channel<sup>37</sup>, suggesting that FtsW<sup>K370</sup>  
471 conformation can regulate substrate or product transport. We also did not address in detail the  
472 hypothesis of a diprotomeric Fts[QLBWI]<sub>2</sub> complex or the role of cytoplasmic FtsL-FtsW  
473 interactions<sup>43</sup>. Nevertheless, we observed stable FtsL-FtsW cytoplasmic interaction in our  
474 simulations even though the N-terminal cytoplasmic tail of FtsW was truncated. Additionally, the  
475 location of the FtsN<sup>E</sup> binding site and conformational changes in FtsL and FtsB helices



Britton and Yovanno *et al.* “Conformational changes in the essential *E. coli* septal cell wall synthesis complex suggest an activation mechanism”

476 observed in simulations with FtsN<sup>E</sup> and FtsI<sup>R167S</sup> are qualitatively compatible with the diprotomer  
477 model that requires flexibility in this region.

478 Lastly, we note that a landmark report of the cryo-EM structure and its associated atomic  
479 model of the FtsQLBWI complex from *P. aeruginosa* just became available while this work is  
480 being prepared <sup>53</sup>. The cryo-EM structure provides insights into interactions within the  
481 FtsQLBWI complex. The global conformation observed in the cryo-EM structure is remarkably  
482 similar to what we observed in MD simulations, with cryo-EM and MD in agreement that in the  
483 absence of the lipid II substrate, both FtsQLBWI(N) complexes exhibit a tilt of the FtsI TPase  
484 domain by approximately 30 ° relative to FtsW (**Fig. S3E**) when compared to AF2 predictions of  
485 the complex. The observation that FtsN promotes FtsL<sup>R67</sup>-FtsI<sup>D225</sup> interaction in our work is  
486 homologous to *P. aeruginosa* FtsL<sup>Y45</sup>-FtsI<sup>N212</sup> in the cryo-EM atomic model in the absence of  
487 FtsN, suggesting a dependence of *E. coli* on FtsN. Kashammer *et al.*, hypothesized that a  
488 transition from the observed bent conformation to the AF2-predicted straight conformation could  
489 be associated with binding of substrate or proteins such as FtsN. Our results here, when further  
490 combined with our previous results for FtsN <sup>17</sup>, demonstrate that FtsN<sup>E</sup> is associated with  
491 FtsQLBWI on the sPG track, with MD suggesting that FtsN activates the GTase activity of FtsW  
492 in the observed bent conformation.

493 In summary, our results are not only consistent with past biochemical and genetic  
494 studies, but also shed light on the molecular details of active and inactive conformations of  
495 FtsWI. The approach we developed in this work—structure prediction followed by MD simulation  
496 with results informing experiments to test hypotheses arising from modeled structures—proved  
497 powerful in generating new insights into molecular interactions in the divisome.

## 498 **DATA AND CODE AVAILABILITY**

499 The plasmids and *E. coli* strains used in this study are available from the corresponding authors  
500 upon request. Code for analyzing single-molecule tracking data is available from the Xiao  
501 Laboratory GitHub repository (XiaoLabJHU) <sup>16</sup>. Molecular dynamics trajectories (protein only)  
502 will be uploaded to Zenodo along with code for analyzing the trajectories upon publication. Full  
503 all-atom trajectories will be made available in the Anton 2 database also upon publication.  
504 Included in the submission are PDBs for the last frame of each simulation.

505

Britton and Yovanno *et al.* “Conformational changes in the essential *E. coli* septal cell wall synthesis complex suggest an activation mechanism”

## 506 **ACKNOWLEDGEMENTS**

507 The authors thank all members of the Hensel, Xiao, and Lau laboratories for helpful discussions  
508 and feedback on the manuscript. ZH received support for this work from FCT - Fundação para a  
509 Ciência e a Tecnologia, I.P., through MOSTMICRO-ITQB R&D Unit (UIDB/04612/2020,  
510 UIDP/04612/2020) and LS4FUTURE Associated Laboratory (LA/P/0087/2020), from a joint  
511 research agreement with the Okinawa Institute of Science and Technology, and from the  
512 Google Cloud Research Credits program with the award GCP20210916. Work in the Xiao  
513 laboratory was supported by NIH F32GM143895 (B.M.B.), NIH T32GM007445 (J.W.M), and  
514 R35GM136436 (J.X.). Anton 2 computer time (MCB130045P) was provided by the Pittsburgh  
515 Supercomputing Center (PSC) through NIH grant R01GM116961 (to A.Y.L.); the Anton 2  
516 machine at PSC was generously made available by D.E. Shaw Research. We also used  
517 resources provided by and Advanced Research Computing at Hopkins (ARCH) at Johns  
518 Hopkins University. This work was funded by the Johns Hopkins Catalyst Award (to A.Y.L.); NIH  
519 T32GM135131 (to R.A.Y.).

520

## 521 **AUTHOR INFORMATION**

### 522 **Authors and Affiliations**

523 **Department of Biophysics and Biophysical Chemistry, Johns Hopkins School of**  
524 **Medicine, Baltimore, MD, 21205, USA**

525 Brooke M. Britton, Remy A. Yovanno, Joshua McCausland, Albert Y. Lau, Jie Xiao

526

527 **ITQB NOVA, Universidade NOVA de Lisboa, Lisbon, Av. da República, 2780-157 Oeiras,**  
528 **Portugal.**

529 Sara F. Costa, Zach Hensel

530

### 531 **Contributions**

532 B.M.B., J.X., and Z.H. conceived the experiments. R.A.Y. and A.Y.L. designed the simulation  
533 workflow. B.M.B. and J.W.M. constructed plasmids and strains for imaging experiments. B.M.B.  
534 performed single molecule and phenotype imaging, genetic experiments, and all imaging  
535 analysis. R.A.Y. performed molecular dynamic simulations. R.A.Y. and Z.H. wrote analysis code.

Britton and Yovanno *et al.* “Conformational changes in the essential *E. coli* septal cell wall synthesis complex suggest an activation mechanism”

536 B.M.B., R.A.Y., A.Y.L., J.X., and Z.H. analyzed molecular dynamics data. S.C. and Z.H.  
537 analyzed sequence conservation. B.M.B., R.A.Y., J.X., and Z.H. wrote the original draft. All  
538 authors reviewed and edited the manuscript. B.M.B., J.W.M., J.X., and Z.H. acquired funding.

539

## 540 **MATERIALS AND METHODS**

### 541 **Complementation assay**

542 To ensure proper growth of  $\DeltaftsL$  and  $\DeltaftsI$  strains, arabinose was included during maintenance  
543 and preparation to induce *pBAD-ftsL* and *pBAD-ftsI* respectively. Cells were grown overnight at  
544 37 °C in LB and 0.2% arabinose from a single colony. The following day, the saturated culture  
545 was reinoculated 1:1000 in fresh LB with 0.2% arabinose. Cells were grown in log phase at  
546 37 °C to an OD600 of 0.5 for all conditions. Cells were then washed three times with 0.9%  
547 saline. They were then serial diluted in 0.9% saline and plated on LB plates containing either  
548 0.2% arabinose or 0.4% glucose (to repress pBAD plasmids) and IPTG as noted. Plates were  
549 grown at 37 °C overnight and then imaged.

### 550 **Plasmid and Strain Construction**

551 Plasmids used in this study (**Supplementary Table S1**) were assembled by Polymerase Chain  
552 Reactions (PCR) amplifying insert and vector DNA fragments followed by In-Fusion cloning  
553 (Takara Biosciences, In-Fusion HD Cloning Kit). Oligonucleotides (Integrated DNA  
554 Technologies) used in PCR amplifications are described in **Supplementary Table S8**. All  
555 plasmids were verified by DNA sequencing. After construction, electroporation was used to  
556 transform plasmids to create strains of interest (**Supplementary Table S7**) under appropriate  
557 antibiotic selection. Depletion strains were maintained under arabinose induction to maintain  
558 wild-type phenotype.

### 559 **Single-molecule tracking sample preparation, imaging, and data analysis**

560 Prior to imaging, cells were grown to log phase at 25 °C in defined minimal M9 medium (0.4%  
561 glucose, 1x MEM amino acids, and 1x MEM vitamins, M9(+) glucose). Cells were incubated for  
562 20 minutes with the addition of 50 nM Janelia Fluor 646 (JF646). Following labeling, cells were  
563 washed 3 times with M9(-) glucose (0.4% glucose and 1x MEM vitamins). Cells were placed  
564 onto a 3% agarose gel pad (M9(-) glucose), sandwiched with a coverslip, and enclosed within  
565 an FSC2 chamber (Bioprotechs) for imaging. Cells were imaged after 30 minutes of equilibration  
566 on the microscope.

Britton and Yovanno *et al.* “Conformational changes in the essential *E. coli* septal cell wall synthesis complex suggest an activation mechanism”

567 For experiments with Fosfomycin, 200 µg/ml of fosfomycin was added to the gel pad and to the  
568 cells following the final wash step. Cells were imaged 1 hour after Fosfomycin addition. For  
569 experiments with rich, defined medium, EZDRM (Teknova) was used in place of M9 for the  
570 growth media, wash buffer, and gel pad.

571 HaloTag-FtsB tracking was performed on a home-built microscope as previously described<sup>16,29</sup>.  
572 Briefly, strains were imaged on an Olympus IX-71 microscope body using an UPLANapo  
573 100XOHR Objective (NA1.50/oil) with a 1.6 x field lens engaged. JF646 was imaged with a 674-  
574 nm laser (Coherent) at an excitation power density of ~25 W/cm<sup>2</sup>. The exposure time was 500  
575 ms and the imaging frame rate was 1 fps.

576 Single-molecule data analysis was performed as previously described<sup>16,17,29</sup>. Briefly, *xy*  
577 positions of single molecules were determined using the ImageJ plug-in, ThunderSTORM<sup>56</sup>.  
578 The remaining data analysis and postprocessing was performed using home-built MATLAB  
579 scripts available from the Xiao Laboratory GitHub repository (XiaoLabJHU)<sup>16</sup>. In short, using a  
580 nearest-neighbor algorithm, single molecules were linked to trajectories. Using the bright-field  
581 image as a visual guide, only trajectories near the midplane of a cell's long axis or visible  
582 constriction sites were chosen to ensure the measurements were made on single molecules at  
583 the cell-division site. The true displacement of tracked molecules around the circumference of a  
584 cell is underestimated in 2D single-molecule tracking due to the cylindrical cell envelope.  
585 Therefore, the trajectories were unwrapped to one-dimension. Unwrapped trajectories were  
586 then segmented manually to determine stationary or processive movement. These procedures  
587 were described in detail in<sup>16</sup>.

588 The cumulative probability distribution of directional moving velocities was calculated for each  
589 condition and fit to either a single or double log-normal population:

$$590 \quad CDF = P_1 \frac{1 + \operatorname{erf}\left[\frac{\ln v - \mu_1}{\sqrt{2}\sigma_1}\right]}{2} + (1 - P_1) \frac{1 + \operatorname{erf}\left[\frac{\ln v - \mu_2}{\sqrt{2}\sigma_2}\right]}{2},$$

591 where *v* is the moving velocity and *P*<sub>1</sub> is the percentage of the first population. For a single  
592 population, *P*<sub>1</sub> = 1. The parameters *μ* and *σ* are the natural logarithmic mean and standard  
593 deviation of the log-normal distribution. The average velocity was calculated using  $\exp\left(\mu + \frac{\sigma^2}{2}\right)$ .  
594 To estimate errors in parameter estimates, CDF curves were generated for 1,000 bootstrapped  
595 samples and fit, with the standard deviations of parameter fits estimating 1 standard error of  
596 measurement (s.e.m.).

Britton and Yovanno *et al.* “Conformational changes in the essential *E. coli* septal cell wall synthesis complex suggest an activation mechanism”

597 **Bright-field sample preparation and imaging**

598 Cells were grown overnight at 37 °C in LB and 0.2% arabinose from a single colony. The  
599 following day, the saturated culture was reinoculated 1:1000 in fresh LB with the appropriate  
600 inducer and/or repressor (0.2% arabinose, 0.4% glucose, and/or ITPG as noted). Cells were  
601 grown to log phase at 37 °C. Cells were then washed three times with 0.9% saline with the  
602 appropriate inducer and/or repressor (0.2% arabinose, 0.4% glucose, and/or ITPG as noted).  
603 Cells were placed onto a 3% agarose gel pad (0.9% saline with the appropriate inducer and/or  
604 repressor (0.2% arabinose, 0.4% glucose, and/or ITPG as noted), sandwiched with a coverslip,  
605 and enclosed within an FSC2 chamber (Bioprotechs) for immediate imaging. Phase imaging was  
606 performed on a home-built microscope as previously described<sup>29</sup> or on the same microscope as  
607 that used for single-molecule tracking experiment with condenser lamp illumination.

608 **Prediction of protein complex structures**

609 We used AlphaFold2<sup>22</sup> as implemented in ColabFold<sup>31</sup> using the LocalColabFold version and  
610 AlphaFold2 parameters available in September 2021. ColabFold uses the MMseqs2 server<sup>57</sup> to  
611 obtain sequence alignments, greatly reducing local storage and computation requirements.  
612 Predictions were made on a Google Cloud Platform instance with an A100 GPU, taking  
613 approximately 1.5 h including sidechain relaxation. Template structures were not used, and  
614 predictions utilized 48 recycle steps. In preliminary work, we found that AlphaFold2 model 3,  
615 which was trained without templates, typically provided the best performance as measured by  
616 local pLDDT and global pTMscore metrics. Predictions from model 3 for FtsWI, FtsQLBWI, and  
617 FtsQLBWIN were used to generate MD systems. Model 5, which was trained similarly and  
618 produced similar predictions for  $\gamma$ -proteobacterial complexes, was later found to reproduce  
619 some additional reported interactions in other species and was used for *B. subtilis* and *S.*  
620 *pneumonia* in **Fig. S2B**. We did not use AlphaFold-multimer<sup>24</sup> for these predictions, as its initial  
621 implementation resulted in structures with steric clashes that could not be directly used for  
622 building MD systems. We note that this has since been addressed and that later versions of  
623 AlphaFold-multimer give similar predictions of divisome complexes to what we report that  
624 typically lack clashes and are appropriate for MD. All structure predictions shown in the  
625 manuscript, as well as protein complex structures following 1  $\mu$ s of MD, are available for  
626 download.

Britton and Yovanno *et al.* “Conformational changes in the essential *E. coli* septal cell wall synthesis complex suggest an activation mechanism”

## 627 **Conservation of FtsN<sup>E</sup>**

628 We constructed sequence logos illustrating FtsN<sup>E</sup> conservation following previously reported  
629 methods applied to the *E. coli* FtsN cytoplasmic domain<sup>58</sup>. Sequences annotated as FtsN  
630 (TIGRFAM code TIGR02223) were downloaded from Annotree<sup>59</sup> for *Enterobacteriaceae* (513),  
631 *Pasteurellaceae* (113), and *Vibrionaceae* (227). Sequences that were obviously missannotated  
632 based on length or other features were manually removed. Multiple sequence alignments were  
633 constructed using MUSCLE<sup>60</sup> and sequence logos for regions corresponding to *E. coli* FtsN<sup>73-95</sup>  
634 were obtained using WebLogo 3<sup>61</sup>. Only 10 FtsN sequences were identified for  
635 *Pseudomonadaceae* following this method, so we obtained 304 sequences homologous to *P.*  
636 *aeruginosa* FtsN<sup>68-118</sup> in *Pseudomonadaceae* using blastp against the RefSeq Select proteins  
637 database, verifying that this also reproduced conservation observed for *Enterobacteriaceae*  
638 when using *E. coli* FtsN<sup>58-108</sup> in the same way.

## 639 **Equilibrium molecular dynamics simulation of FtsQLBWI and FtsQLBWIN complexes** 640 **with superfission and dominant negative variants**

641 Simulation systems for molecular dynamics were constructed from AlphaFold models of FtsWI,  
642 FtsQLBWI, and FtsQLBWIN including the following subunits and residues: FtsQ (20-276), FtsL  
643 (1-121), FtsB (1-103), FtsW (46-414), FtsI (19-588), and FtsN (58-108). Mutations of interest  
644 were made using the Mutagenesis Wizard of the PyMOL molecular visualization software.

645 All systems were embedded in a POPE membrane and solvated (see **Table S4** for system  
646 dimensions) with 150 mM NaCl in TIP3P water<sup>62</sup> using the CHARMM-GUI Membrane Builder.  
647 All systems were electrically neutral. N-termini of FtsQ, FtsW, FtsI, and FtsN were capped with  
648 the CHARMM ACE patch, and the C-terminus of FtsN was capped with the CHARMM CT3  
649 patch. Equilibration was performed according to the CHARMM-GUI equilibration protocol  
650 involving a series of gradually relaxing sidechain and backbone restraints. After equilibration, 5  
651 ns pre-production simulations were performed prior to simulation on the special-purpose  
652 supercomputer Anton 2 at the Pittsburgh Supercomputing Center.

653 Simulations on Anton 2 were performed using the CHARMM36m forcefield in an NPT ensemble  
654 at 310 K, 1 atm, and with a timestep of 2.5 fs. Bond lengths for hydrogen atoms were  
655 constrained using the M-SHAKE algorithm<sup>63</sup>. An r-RESPA integrator<sup>64</sup> was used; long-range  
656 electrostatics were computed every 6 fs. Long-range electrostatics interactions were calculated  
657 using the k-space Gaussian split Ewald method<sup>65</sup>. Trajectories were written at an output  
658 frequency of 0.24 ns/frame. Each trajectory was unwrapped using the PBCTools plugin of VMD

Britton and Yovanno *et al.* “Conformational changes in the essential *E. coli* septal cell wall synthesis complex suggest an activation mechanism”

659 and aligned to the backbone atoms of FtsW (segid PROD) to facilitate comparison across  
660 complexes. Code for analyzing simulations was written using the MDAnalysis python package.  
661 Hydrogen bonds between relevant interfaces were computed using the HydrogenBondAnalysis  
662 function of MDAnalysis (v 1.0.0) in which a hydrogen bond is defined by a distance cutoff of 3.0  
663 Å and an angle cutoff of 150°.

664 **Dynamical network analysis for computing optimal paths**

665 Dynamical network representations of the FtsQBLWI, FtsQLBWI<sup>R167S</sup>, FtsQL<sup>R61E</sup>BWI, and  
666 FtsQLBWIN complexes were generated using the dynetan python package <sup>66</sup>. In the network,  
667 each node is defined as the C<sub>α</sub> atom of a residue, and pairs of nodes are considered connected  
668 if their heavy atoms are within 4.5 Å of each other for at least 75% of the final 500 ns of the  
669 trajectory. The strength of an edge between two nodes is calculated using a correlation  
670 coefficient computed from a k-nearest-neighbor-based estimator of mutual information <sup>66</sup>. From  
671 these correlations, optimal paths were computed using the Floyd-Warshall algorithm  
672 implemented in dynetan and NetworkX <sup>67</sup>. To illustrate long-range interaction paths, a source  
673 node was selected as the first simulated residue of FtsQ (FtsQ<sup>N20</sup>) and target nodes were  
674 selected as the catalytic residues of FtsW (FtsW<sup>D297</sup>) and FtsI (FtsI<sup>S307</sup>), resulting in two  
675 ensembles of optimal paths.

676

677 **REFERENCES**

- 678 1 Schneider, T. & Sahl, H. G. An oldie but a goodie - cell wall biosynthesis as antibiotic  
679 target pathway. *Int J Med Microbiol* **300**, 161-169 (2010).  
680 <https://doi.org/10.1016/j.ijmm.2009.10.005>
- 681 2 Silver, L. L. Does the cell wall of bacteria remain a viable source of targets for novel  
682 antibiotics? *Biochem Pharmacol* **71**, 996-1005 (2006).  
683 <https://doi.org/10.1016/j.bcp.2005.10.029>
- 684 3 Bi, E. F. & Lutkenhaus, J. FtsZ ring structure associated with division in Escherichia coli.  
685 *Nature* **354**, 161-164 (1991). <https://doi.org/10.1038/354161a0>
- 686 4 Nanninga, N. Cell division and peptidoglycan assembly in Escherichia coli. *Mol Microbiol*  
687 **5**, 791-795 (1991). <https://doi.org/10.1111/j.1365-2958.1991.tb00751.x>
- 688 5 Levin, P. A. & Janakiraman, A. Localization, Assembly, and Activation of the Escherichia  
689 coli Cell Division Machinery. *EcoSal Plus* **9**, eESP00222021 (2021).  
690 <https://doi.org/10.1128/ecosalplus.ESP-0022-2021>

Britton and Yovanno *et al.* “Conformational changes in the essential *E. coli* septal cell wall synthesis complex suggest an activation mechanism”

- 691 6 Taguchi, A. *et al.* FtsW is a peptidoglycan polymerase that is functional only in complex  
692 with its cognate penicillin-binding protein. *Nat Microbiol* **4**, 587-594 (2019).  
693 <https://doi.org/10.1038/s41564-018-0345-x>
- 694 7 Fraipont, C. *et al.* The integral membrane FtsW protein and peptidoglycan synthase  
695 PBP3 form a subcomplex in *Escherichia coli*. *Microbiology (Reading)* **157**, 251-259  
696 (2011). <https://doi.org/10.1099/mic.0.040071-0>
- 697 8 Marmont, L. S. & Bernhardt, T. G. A conserved subcomplex within the bacterial  
698 cytokinetic ring activates cell wall synthesis by the FtsW-FtsI synthase. *Proc Natl Acad*  
699 *Sci U S A* **117**, 23879-23885 (2020). <https://doi.org/10.1073/pnas.2004598117>
- 700 9 Park, K. T., Du, S. & Lutkenhaus, J. Essential Role for FtsL in Activation of Septal  
701 Peptidoglycan Synthesis. *mBio* **11** (2020). <https://doi.org/10.1128/mBio.03012-20>
- 702 10 Tsang, M. J. & Bernhardt, T. G. A role for the FtsQLB complex in cytokinetic ring  
703 activation revealed by an ftsL allele that accelerates division. *Mol Microbiol* **95**, 925-944  
704 (2015). <https://doi.org/10.1111/mmi.12905>
- 705 11 Du, S. & Lutkenhaus, J. Assembly and activation of the *Escherichia coli* divisome. *Mol*  
706 *Microbiol* **105**, 177-187 (2017). <https://doi.org/10.1111/mmi.13696>
- 707 12 Gerding, M. A. *et al.* Self-enhanced accumulation of FtsN at Division Sites and Roles for  
708 Other Proteins with a SPOR domain (DamX, DedD, and RlpA) in *Escherichia coli* cell  
709 constriction. *J Bacteriol* **191**, 7383-7401 (2009). <https://doi.org/10.1128/JB.00811-09>
- 710 13 Yahashiri, A., Jorgenson, M. A. & Weiss, D. S. Bacterial SPOR domains are recruited to  
711 septal peptidoglycan by binding to glycan strands that lack stem peptides. *Proc Natl*  
712 *Acad Sci U S A* **112**, 11347-11352 (2015). <https://doi.org/10.1073/pnas.1508536112>
- 713 14 Liu, B., Persons, L., Lee, L. & de Boer, P. A. Roles for both FtsA and the FtsBLQ  
714 subcomplex in FtsN-stimulated cell constriction in *Escherichia coli*. *Mol Microbiol* **95**,  
715 945-970 (2015). <https://doi.org/10.1111/mmi.12906>
- 716 15 Pichoff, S., Du, S. & Lutkenhaus, J. Disruption of divisome assembly rescued by FtsN-  
717 FtsA interaction in *Escherichia coli*. *Proc Natl Acad Sci U S A* **115**, E6855-E6862 (2018).  
718 <https://doi.org/10.1073/pnas.1806450115>
- 719 16 Yang, X. *et al.* A two-track model for the spatiotemporal coordination of bacterial septal  
720 cell wall synthesis revealed by single-molecule imaging of FtsW. *Nat Microbiol* **6**, 584-  
721 593 (2021). <https://doi.org/10.1038/s41564-020-00853-0>
- 722 17 Lyu, Z. *et al.* FtsN maintains active septal cell wall synthesis by forming a processive  
723 complex with the septum-specific peptidoglycan synthases in *E. coli*. *Nat Commun* **13**,  
724 5751 (2022). <https://doi.org/10.1038/s41467-022-33404-8>



Britton and Yovanno *et al.* "Conformational changes in the essential *E. coli* septal cell wall synthesis complex suggest an activation mechanism"

- 725 18 Boes, A., Olatunji, S., Breukink, E. & Terrak, M. Regulation of the Peptidoglycan  
726 Polymerase Activity of PBP1b by Antagonist Actions of the Core Divisome Proteins  
727 FtsBLQ and FtsN. *mBio* **10** (2019). <https://doi.org/10.1128/mBio.01912-18>
- 728 19 Li, Y. *et al.* Genetic analysis of the septal peptidoglycan synthase FtsWI complex  
729 supports a conserved activation mechanism for SEDS-bPBP complexes. *PLoS Genet* **17**,  
730 e1009366 (2021). <https://doi.org/10.1371/journal.pgen.1009366>
- 731 20 Wissel, M. C. & Weiss, D. S. Genetic analysis of the cell division protein FtsI (PBP3):  
732 amino acid substitutions that impair septal localization of FtsI and recruitment of FtsN. *J*  
733 *Bacteriol* **186**, 490-502 (2004). <https://doi.org/10.1128/jb.186.2.490-502.2004>
- 734 21 Attaibi, M. & den Blaauwen, T. An Updated Model of the Divisome: Regulation of the  
735 Septal Peptidoglycan Synthesis Machinery by the Divisome. *Int J Mol Sci* **23** (2022).  
736 <https://doi.org/10.3390/ijms23073537>
- 737 22 Jumper, J. *et al.* Highly accurate protein structure prediction with AlphaFold. *Nature* **596**,  
738 583-589 (2021). <https://doi.org/10.1038/s41586-021-03819-2>
- 739 23 Craven, S. J., Condon, S. G. F., Diaz Vazquez, G., Cui, Q. & Senes, A. The coiled-coil  
740 domain of Escherichia coli FtsLB is a structurally detuned element critical for modulating  
741 its activation in bacterial cell division. *J Biol Chem* **298**, 101460 (2022).  
742 <https://doi.org/10.1016/j.jbc.2021.101460>
- 743 24 Evans, R. *et al.* Protein complex prediction with AlphaFold-Multimer. *bioRxiv*,  
744 2021.2010.2004.463034 (2022). <https://doi.org/10.1101/2021.10.04.463034>
- 745 25 Baek, M. *et al.* Accurate prediction of protein structures and interactions using a three-  
746 track neural network. *Science* **373**, 871-876 (2021).  
747 <https://doi.org/doi:10.1126/science.abj8754>
- 748 26 Bryant, P., Pozzati, G. & Elofsson, A. Improved prediction of protein-protein interactions  
749 using AlphaFold2. *Nat Commun* **13**, 1265 (2022). [https://doi.org/10.1038/s41467-022-](https://doi.org/10.1038/s41467-022-28865-w)  
750 [28865-w](https://doi.org/10.1038/s41467-022-28865-w)
- 751 27 Modi, V. & Dunbrack, R. L. Kincore: a web resource for structural classification of protein  
752 kinases and their inhibitors. *Nucleic Acids Res* **50**, D654-D664 (2022).  
753 <https://doi.org/10.1093/nar/gkab920>
- 754 28 Pak, M. A. *et al.* Using AlphaFold to predict the impact of single mutations on protein  
755 stability and function. *bioRxiv*, 2021.2009.2019.460937 (2021).  
756 <https://doi.org/10.1101/2021.09.19.460937>

Britton and Yovanno *et al.* “Conformational changes in the essential *E. coli* septal cell wall synthesis complex suggest an activation mechanism”

- 757 29 McCausland, J. W. *et al.* Treadmilling FtsZ polymers drive the directional movement of  
758 sPG-synthesis enzymes via a Brownian ratchet mechanism. *Nat Commun* **12**, 609  
759 (2021). <https://doi.org/10.1038/s41467-020-20873-y>
- 760 30 Buddelmeijer, N. & Beckwith, J. A complex of the Escherichia coli cell division proteins  
761 FtsL, FtsB and FtsQ forms independently of its localization to the septal region. *Mol*  
762 *Microbiol* **52**, 1315-1327 (2004). <https://doi.org/10.1111/j.1365-2958.2004.04044.x>
- 763 31 Mirdita, M. *et al.* ColabFold: making protein folding accessible to all. *Nat Methods* **19**,  
764 679-682 (2022). <https://doi.org/10.1038/s41592-022-01488-1>
- 765 32 Basu, S. & Wallner, B. DockQ: A Quality Measure for Protein-Protein Docking Models.  
766 *PLoS One* **11**, e0161879 (2016). <https://doi.org/10.1371/journal.pone.0161879>
- 767 33 Morales Angeles, D., Macia-Valero, A., Bohorquez, L. C. & Scheffers, D. J. The PASTA  
768 domains of Bacillus subtilis PBP2B strengthen the interaction of PBP2B with DivIB.  
769 *Microbiology (Reading)* **166**, 826-836 (2020). <https://doi.org/10.1099/mic.0.000957>
- 770 34 Bernardo-García, N. *et al.* Allostery, Recognition of Nascent Peptidoglycan, and Cross-  
771 linking of the Cell Wall by the Essential Penicillin-Binding Protein 2x of Streptococcus  
772 pneumoniae. *ACS Chemical Biology* **13**, 694-702 (2018).  
773 <https://doi.org/10.1021/acscchembio.7b00817>
- 774 35 Robichon, C., Karimova, G., Beckwith, J. & Ladant, D. Role of leucine zipper motifs in  
775 association of the Escherichia coli cell division proteins FtsL and FtsB. *J Bacteriol* **193**,  
776 4988-4992 (2011). <https://doi.org/10.1128/JB.00324-11>
- 777 36 Sjodt, M. *et al.* Structure of the peptidoglycan polymerase RodA resolved by evolutionary  
778 coupling analysis. *Nature* **556**, 118-121 (2018). <https://doi.org/10.1038/nature25985>
- 779 37 Sjodt, M. *et al.* Structural coordination of polymerization and crosslinking by a SEDS-  
780 bPBP peptidoglycan synthase complex. *Nat Microbiol* **5**, 813-820 (2020).  
781 <https://doi.org/10.1038/s41564-020-0687-z>
- 782 38 Freischem, S. *et al.* Interaction Mode of the Novel Monobactam AIC499 Targeting  
783 Penicillin Binding Protein 3 of Gram-Negative Bacteria. *Biomolecules* **11** (2021).
- 784 39 Kureisaite-Ciziene, D. *et al.* Structural Analysis of the Interaction between the Bacterial  
785 Cell Division Proteins FtsQ and FtsB. *mBio* **9** (2018).  
786 <https://doi.org/10.1128/mBio.01346-18>
- 787 40 Li, Y. *et al.* Identification of the potential active site of the septal peptidoglycan  
788 polymerase FtsW. *PLoS Genet* **18**, e1009993 (2022).  
789 <https://doi.org/10.1371/journal.pgen.1009993>

Britton and Yovanno *et al.* “Conformational changes in the essential *E. coli* septal cell wall synthesis complex suggest an activation mechanism”

- 790 41 Park, K. T., Pichoff, S., Du, S. & Lutkenhaus, J. FtsA acts through FtsW to promote cell  
791 wall synthesis during cell division in Escherichia coli. *Proc Natl Acad Sci U S A* **118**  
792 (2021). <https://doi.org/10.1073/pnas.2107210118>
- 793 42 Choi, Y. *et al.* Structural Insights into the FtsQ/FtsB/FtsL Complex, a Key Component of  
794 the Divisome. *Sci Rep* **8**, 18061 (2018). <https://doi.org/10.1038/s41598-018-36001-2>
- 795 43 Craven, S. J., Condon, S. G. F. & Senes, A. A model of the interactions between the  
796 FtsQLB and the FtsWI peptidoglycan synthase complex in bacterial cell division. *bioRxiv*,  
797 2022.2010.2030.514410 (2022). <https://doi.org/10.1101/2022.10.30.514410>
- 798 44 Nagasawa, H. *et al.* Determination of the cleavage site involved in C-terminal processing  
799 of penicillin-binding protein 3 of Escherichia coli. *J Bacteriol* **171**, 5890-5893 (1989).  
800 <https://doi.org/10.1128/jb.171.11.5890-5893.1989>
- 801 45 Hara, H. *et al.* Genetic analyses of processing involving C-terminal cleavage in penicillin-  
802 binding protein 3 of Escherichia coli. *J Bacteriol* **171**, 5882-5889 (1989).  
803 <https://doi.org/10.1128/jb.171.11.5882-5889.1989>
- 804 46 Gonzalez, M. D., Akbay, E. A., Boyd, D. & Beckwith, J. Multiple interaction domains in  
805 FtsL, a protein component of the widely conserved bacterial FtsLBQ cell division  
806 complex. *J Bacteriol* **192**, 2757-2768 (2010). <https://doi.org/10.1128/JB.01609-09>
- 807 47 Goehring, N. W., Petrovska, I., Boyd, D. & Beckwith, J. Mutants, suppressors, and  
808 wrinkled colonies: mutant alleles of the cell division gene ftsQ point to functional  
809 domains in FtsQ and a role for domain 1C of FtsA in divisome assembly. *J Bacteriol* **189**,  
810 633-645 (2007). <https://doi.org/10.1128/JB.00991-06>
- 811 48 Condon, S. G. F. *et al.* The FtsLB subcomplex of the bacterial divisome is a tetramer  
812 with an uninterrupted FtsL helix linking the transmembrane and periplasmic regions. *J*  
813 *Biol Chem* **293**, 1623-1641 (2018). <https://doi.org/10.1074/jbc.RA117.000426>
- 814 49 Park, K.-T., Du, S. & Lutkenhaus, J. Essential role for FtsL in activation of septal PG  
815 synthesis. *bioRxiv*, 2020.2009.2001.275982 (2020).  
816 <https://doi.org/10.1101/2020.09.01.275982>
- 817 50 Brown, A. M. & Zondlo, N. J. A propensity scale for type II polyproline helices (PPII):  
818 aromatic amino acids in proline-rich sequences strongly disfavor PPII due to proline-  
819 aromatic interactions. *Biochemistry* **51**, 5041-5051 (2012).  
820 <https://doi.org/10.1021/bi3002924>
- 821 51 Williams, K. P. *et al.* Phylogeny of gammaproteobacteria. *J Bacteriol* **192**, 2305-2314  
822 (2010). <https://doi.org/10.1128/jb.01480-09>

Britton and Yovanno *et al.* "Conformational changes in the essential *E. coli* septal cell wall synthesis complex suggest an activation mechanism"

- 823 52 Gao, B., Mohan, R. & Gupta, R. S. Phylogenomics and protein signatures elucidating the  
824 evolutionary relationships among the Gammaproteobacteria. *Int J Syst Evol Microbiol* **59**,  
825 234-247 (2009). <https://doi.org/10.1099/ijls.0.002741-0>
- 826 53 Kashhammer, L. *et al.* Divisome core complex in bacterial cell division revealed by cryo-  
827 EM. *bioRxiv*, 2022.2011.2021.517367 (2022).  
828 <https://doi.org/10.1101/2022.11.21.517367>
- 829 54 Melo, M. C. R., Bernardi, R. C., Fuente-Nunez, C. d. I. & Luthey-Schulten, Z.  
830 Generalized correlation-based dynamical network analysis: a new high-performance  
831 approach for identifying allosteric communications in molecular dynamics trajectories.  
832 *The Journal of Chemical Physics* **153**, 134104 (2020). <https://doi.org/10.1063/5.0018980>
- 833 55 Gómez, M. J., Desviat, L. R., Merchante, R. & Ayala, J. A. in *Bacterial Growth and Lysis: Metabolism and Structure of the Bacterial Sacculus* (eds M. A. de Pedro, J. V. Höltje, &  
834 W. Löffelhardt) 309-318 (Springer US, 1993).
- 835
- 836 56 Ovesný, M., Křížek, P., Borkovec, J., Svindrych, Z. & Hagen, G. M. ThunderSTORM: a  
837 comprehensive ImageJ plug-in for PALM and STORM data analysis and super-  
838 resolution imaging. *Bioinformatics* **30**, 2389-2390 (2014).  
839 <https://doi.org/10.1093/bioinformatics/btu202>
- 840 57 Steinegger, M. & Soding, J. MMseqs2 enables sensitive protein sequence searching for  
841 the analysis of massive data sets. *Nat Biotechnol* **35**, 1026-1028 (2017).  
842 <https://doi.org/10.1038/nbt.3988>
- 843 58 Nierhaus, T. *et al.* Bacterial divisome protein FtsA forms curved antiparallel double  
844 filaments when binding to FtsN. *Nat Microbiol* **7**, 1686-1701 (2022).  
845 <https://doi.org/10.1038/s41564-022-01206-9>
- 846 59 Mendler, K. *et al.* AnnoTree: visualization and exploration of a functionally annotated  
847 microbial tree of life. *Nucleic Acids Res* **47**, 4442-4448 (2019).  
848 <https://doi.org/10.1093/nar/gkz246>
- 849 60 Edgar, R. C. MUSCLE: a multiple sequence alignment method with reduced time and  
850 space complexity. *BMC Bioinformatics* **5**, 113 (2004). [https://doi.org/10.1186/1471-2105-](https://doi.org/10.1186/1471-2105-5-113)  
851 [5-113](https://doi.org/10.1186/1471-2105-5-113)
- 852 61 Crooks, G. E., Hon, G., Chandonia, J. M. & Brenner, S. E. WebLogo: a sequence logo  
853 generator. *Genome Res* **14**, 1188-1190 (2004). <https://doi.org/10.1101/gr.849004>
- 854 62 Jorgensen, W. L., Chandrasekhar, J., Madura, J. D., Impey, R. W. & Klein, M. L.  
855 Comparison of simple potential functions for simulating liquid water. *The Journal of*  
856 *Chemical Physics* **79**, 926-935 (1983). <https://doi.org/10.1063/1.445869>

Britton and Yovanno *et al.* "Conformational changes in the essential *E. coli* septal cell wall synthesis complex suggest an activation mechanism"

- 857 63 Kräutler, V., van Gunsteren, W. F. & Hünenberger, P. H. A fast SHAKE algorithm to  
858 solve distance constraint equations for small molecules in molecular dynamics  
859 simulations. *Journal of Computational Chemistry* **22**, 501-508 (2001).  
860 [https://doi.org:https://doi.org/10.1002/1096-987X\(20010415\)22:5<501::AID-](https://doi.org/10.1002/1096-987X(20010415)22:5<501::AID-JCC1021>3.0.CO;2-V)  
861 [JCC1021>3.0.CO;2-V](https://doi.org/10.1002/1096-987X(20010415)22:5<501::AID-JCC1021>3.0.CO;2-V)
- 862 64 Tuckerman, M., Berne, B. J. & Martyna, G. J. Reversible multiple time scale molecular  
863 dynamics. *The Journal of Chemical Physics* **97**, 1990-2001 (1992).  
864 [https://doi.org:10.1063/1.463137](https://doi.org/10.1063/1.463137)
- 865 65 Shan, Y., Klepeis, J. L., Eastwood, M. P., Dror, R. O. & Shaw, D. E. Gaussian split  
866 Ewald: A fast Ewald mesh method for molecular simulation. *The Journal of Chemical*  
867 *Physics* **122**, 054101 (2005). [https://doi.org:10.1063/1.1839571](https://doi.org/10.1063/1.1839571)
- 868 66 Melo, M. C. R., Bernardi, R. C., de la Fuente-Nunez, C. & Luthey-Schulten, Z.  
869 Generalized correlation-based dynamical network analysis: a new high-performance  
870 approach for identifying allosteric communications in molecular dynamics trajectories.  
871 *The Journal of Chemical Physics* **153**, 134104 (2020). [https://doi.org:10.1063/5.0018980](https://doi.org/10.1063/5.0018980)
- 872 67 Hagberg, A. S., Pieter; S Chult, Daniel. (2008-01-01).

873

874

875

876

877

878

879

880

881

882

883

884

Britton and Yovanno *et al.* "Conformational changes in the essential *E. coli* septal cell wall synthesis complex suggest an activation mechanism"

885 **FIGURES**

886 **Figure 1**

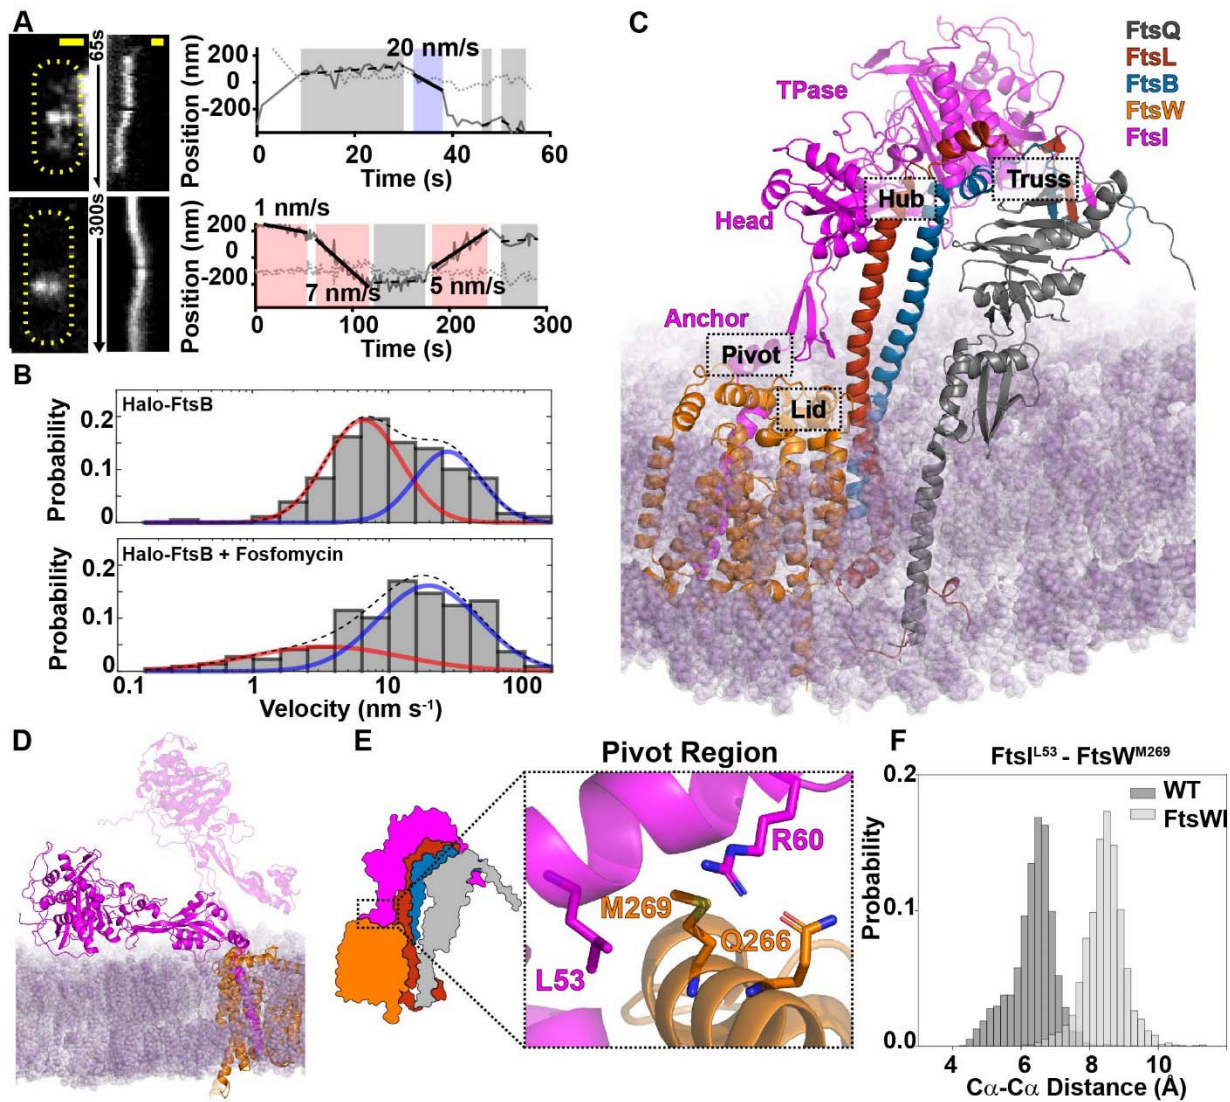

887

888

889 **Figure 1. FtsWI is stabilized in complex with FtsQLB.** (A) Single-molecule tracking of Halo-  
890 FtsB shows two moving populations. Two representative cells with the maximum fluorescence  
891 intensity projection images (left), kymographs of fluorescence line scans at the midcell (middle),  
892 and unwrapped one-dimensional positions of the corresponding Halo-FtsB molecule along the  
893 circumference (solid gray line) and long axis (dotted gray line) of the cell were shown. Scale bar  
894 500 nm. (B) Distributions of velocities of single Halo-FtsB molecules exhibiting directional  
895 motion were fit to velocity distributions of slow-moving (red) and fast-moving (blue) populations

Britton and Yovanno *et al.* “Conformational changes in the essential *E. coli* septal cell wall synthesis complex suggest an activation mechanism”

896 in wild-type *E. coli* cells grown in minimal media in the absence (top) and presence (bottom) of  
897 fosfomycin. A dashed line indicates the summed probability. **(C)** Structure of *E. coli* FtsQLBWI  
898 within a POPE bilayer in the last frame of a 1- $\mu$ s MD simulation. The complex consists of FtsQ  
899 20-276 (gray), FtsL 1-121 (red), FtsB 1-113 (blue), FtsW 46-414 (orange), and FtsI 19-588  
900 (magenta). The FtsI TPase, head and anchor domains are labeled in magenta. The four  
901 interface regions—Pivot, Truss, Hub, and Lid—are highlighted in dashed boxes. **(D)** In the  
902 absence of FtsQLB, FtsI (magenta) collapses to the membrane at the end of the 1- $\mu$ s MD  
903 simulation. The position of FtsI at the beginning of the simulation (transparent) is shown for  
904 comparison. **(E)** Zoomed-in view of the Pivot region in FtsQLBWI, in which interactions between  
905 FtsI<sup>L53</sup> and FtsW<sup>M269</sup> and between FtsI<sup>R60</sup> and FtsW<sup>Q266</sup> secure the position of the FtsI anchor  
906 domain with respect to FtsW. **(F)** In the absence of FtsQLB, interactions between FtsI<sup>L53</sup> and  
907 FtsW<sup>M269</sup> are broken, as shown by the increased C $\alpha$ -C $\alpha$  distances between the two residues  
908 (light gray) compared to that in the presence of FtsQLB (WT, dark gray) in the last 500 ns MD  
909 simulation.

910

Britton and Yovanno *et al.* "Conformational changes in the essential *E. coli* septal cell wall synthesis complex suggest an activation mechanism"

911 **Figure 2**

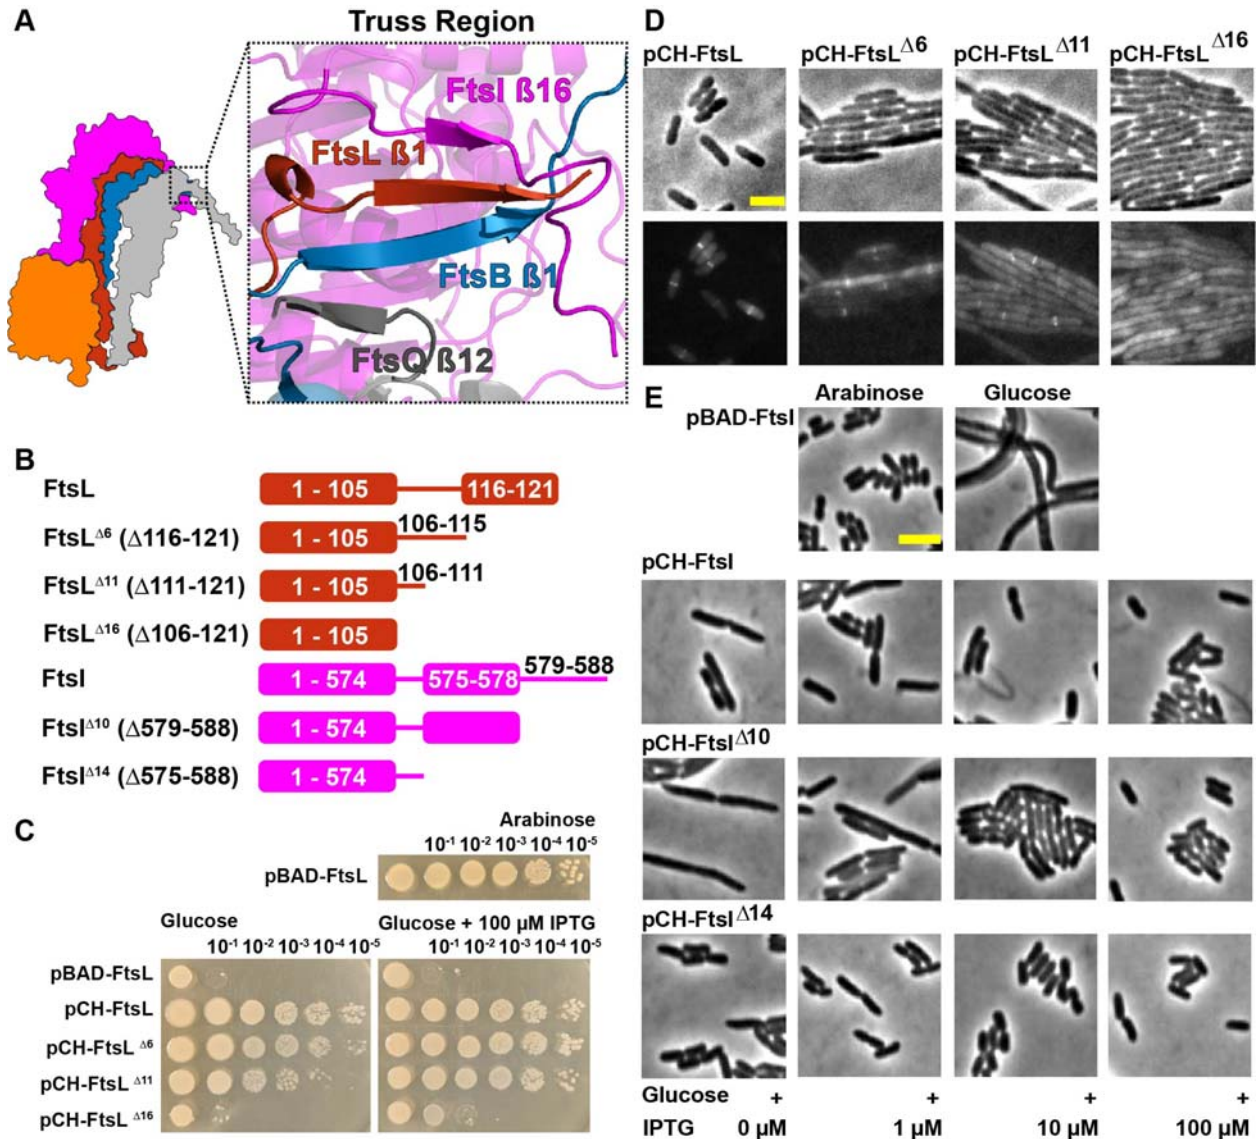

912

913 **Figure 2. C-terminal extended  $\beta$ -sheet of FtsQLBI in the Truss region is important for cell**  
 914 **division. (A)** A detailed view of the Truss region in the final frame of the FtsQLBWI simulation  
 915 illustrates  $\beta$ -sheet interactions between FtsQ (gray), FtsB (blue), FtsL (red), and FtsI (magenta).  
 916 **(B)** Cartoon showing FtsL and FtsI  $\beta$ -strand truncation mutants. **(C)** Complementation test of  
 917 FtsL truncation mutants. *E. coli* cells dependent on arabinose-inducible expression of FtsL were  
 918 depleted of FtsL by growing with glucose and spotted in 10-fold serial dilutions. FtsL variants  
 919 were expressed from plasmids encoding either wild-type FtsL, FtsL<sup>Δ6</sup>, FtsL<sup>Δ11</sup>, or FtsL<sup>Δ16</sup> and  
 920 grown with or without induction with 100  $\mu$ M IPTG. FtsL<sup>Δ16</sup> was unable to complement even at



Britton and Yovanno *et al.* “Conformational changes in the essential *E. coli* septal cell wall synthesis complex suggest an activation mechanism”

921 the highest induction level. **(D)** Images of *E. coli* cells depleted of wild-type FtsL and expressing  
922 an mVenus fusion to FtsL. Truncations of FtsL of increasing length exhibit increasing cell length  
923 (top) and decreased FtsL midcell localization (bottom) relative to cells expressing mVenus fused  
924 to full-length FtsL. Scale bar 3 $\mu$ m. **(E)** Images of *E. coli* cells depleted of wild-type FtsI and  
925 expressing FtsI truncations. A wild-type FtsI fusion and FtsI <sup>$\Delta$ 14</sup> exhibit near-normal cell lengths  
926 even at low induction levels, while FtsI <sup>$\Delta$ 11</sup> exhibits filamentous cells at low expression levels.  
927 Scale bar 3 $\mu$ m.

928

929

930

931

932

933

934

935

936

937

938

939

940

941

942

943

944

945

946

Britton and Yovanno *et al.* "Conformational changes in the essential *E. coli* septal cell wall synthesis complex suggest an activation mechanism"

947 **Figure 3**

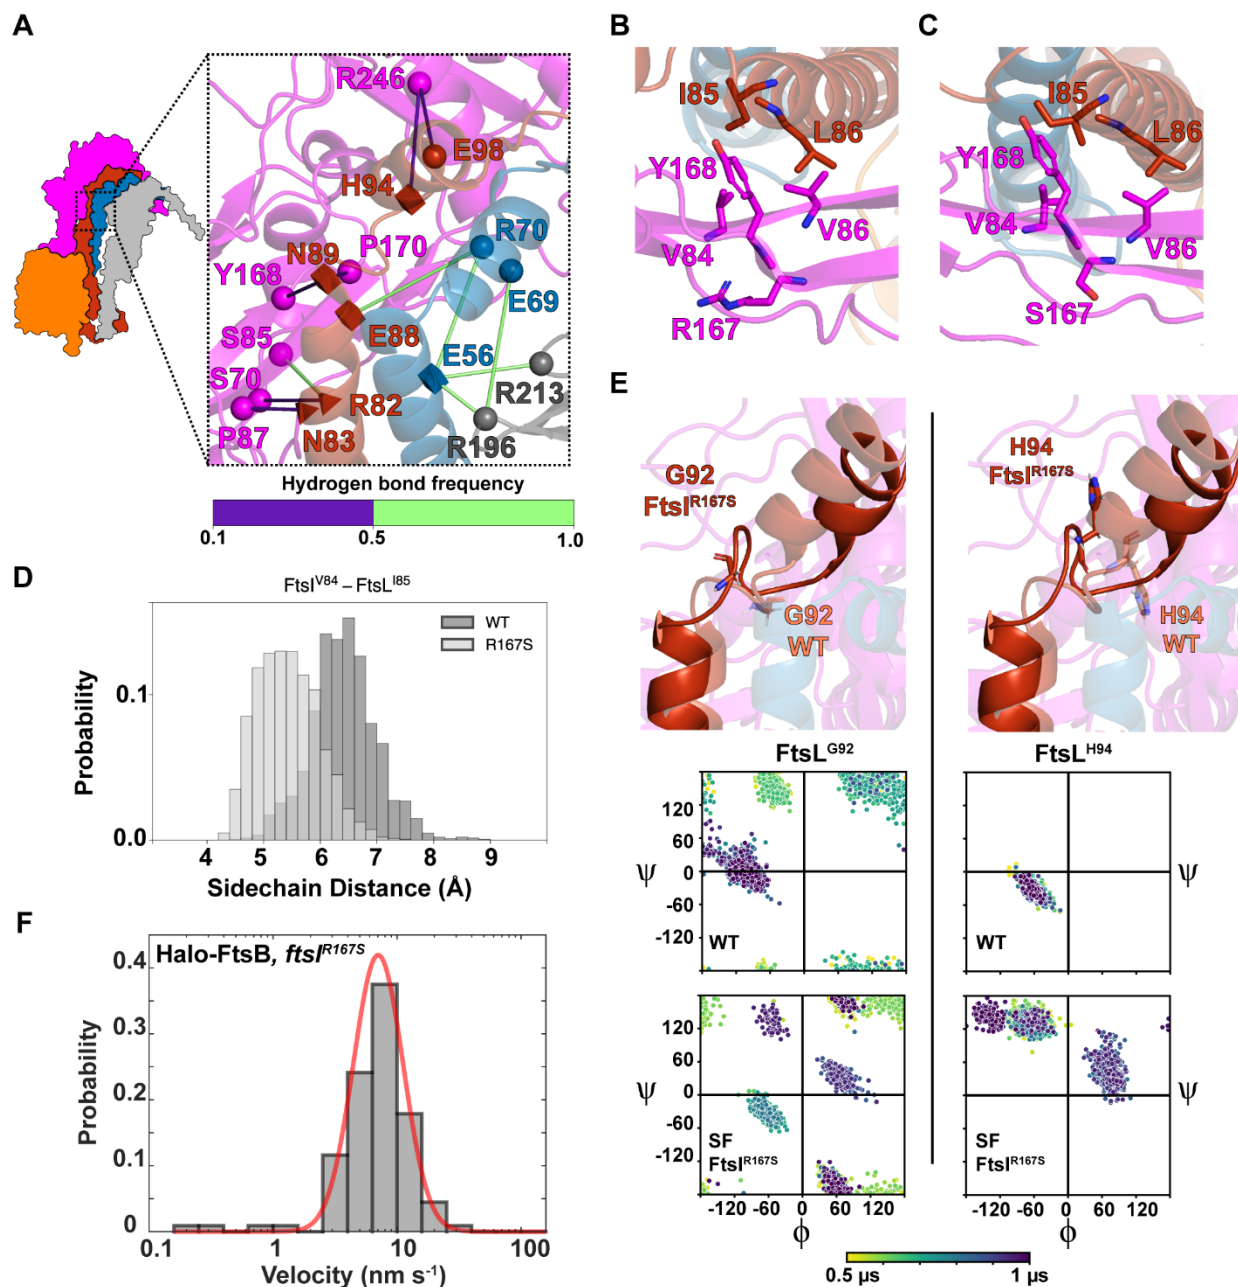

948

949 **Figure 3. Inhibitory and activating interactions between FtsL and FtsI in the Hub region.**

950 **(A)** A hydrogen-bonding network extends from FtsQLB to FtsI in the CCD interface of the Hub  
 951 region. Shapes indicate residues with hydrogen bonding during the last 500 ns of FtsQLBWI  
 952 simulation, with cubes specifying SF mutations (FtsL<sup>N89</sup>, FtsL<sup>E88</sup>, FtsL<sup>H94</sup>, and FtsB<sup>E56</sup>) and  
 953 tetrahedrons specifying DN mutations (FtsL<sup>R82</sup> and FtsL<sup>N83</sup>). Hydrogen bonds occurring in  
 954 between 10% and 50% of the last 500 ns of MD are distinguished from hydrogen bonds

Britton and Yovanno *et al.* "Conformational changes in the essential *E. coli* septal cell wall synthesis complex suggest an activation mechanism"

955 occurring over 50% of the time (colorbar). **(B)** Hydrophobic packing among FtsL<sup>L85</sup>, FtsL<sup>L86</sup>,  
956 FtsL<sup>V86</sup>, FtsL<sup>V84</sup>, and FtsI<sup>Y168</sup> is observed in the AWI domain between FtsL and FtsI in the WT  
957 FtsQLBWI simulation. **(C)** Loss of interactions between FtsI<sup>R167</sup> and other residues in FtsI in  
958 FtsQLBWI<sup>R167S</sup> is associated with changes in FtsL-FtsI hydrophobic packing at the neck of the  
959 FtsI head domain and a change in FtsI orientation relative to FtsL. **(D)** The distance between the  
960 centers of geometry of FtsI<sup>V84</sup> and FtsL<sup>I85</sup> sidechains is decreased in the last 500 ns of the  
961 FtsQLBWI<sup>R167S</sup> simulation compared to WT FtsQLBWI. **(E)** Conformations of FtsL<sup>G92</sup> (left) and  
962 FtsL<sup>H94</sup> (right) were analyzed with respect to side chain positions in context of the Hub region  
963 and dynamics of local secondary structure reflected in the trajectories of backbone dihedral  
964 angles. Top: the FtsI<sup>R167S</sup> mutation was associated with disruption of the second short  $\alpha$ -helix of  
965 FtsL reflected in conformations after 1  $\mu$ s MD for FtsQLBWI (light) and FtsQLBWI<sup>R167S</sup> (dark).  
966 Bottom: the distribution of FtsL<sup>G92</sup> dihedral angles is disrupted for the FtsI<sup>R167S</sup> variant,  
967 coincident with a shift for FtsL<sup>H94</sup> dihedral angles from being  $\alpha$ -helical for FtsQLBWI to being  $\beta$ -  
968 strand-like in FtsQLBWI<sup>R167S</sup>. **(F)** Single-molecule tracking of Halo-FtsB in a strain expressing  
969 SF FtsI<sup>R167S</sup> shows that Halo-FtsB molecules only exhibit a slow-moving population. The velocity  
970 histogram (gray bars) is best fit by a single-population (red,  $v_{slow} = 8.0 \pm 0.4$  nm/s,  $\mu \pm$  s.e.m.,  $n =$   
971 112 segments).

972

973

974

975

976

977

978

979

980

981

982

983

Britton and Yovanno *et al.* "Conformational changes in the essential *E. coli* septal cell wall synthesis complex suggest an activation mechanism"

984 **Figure 4**

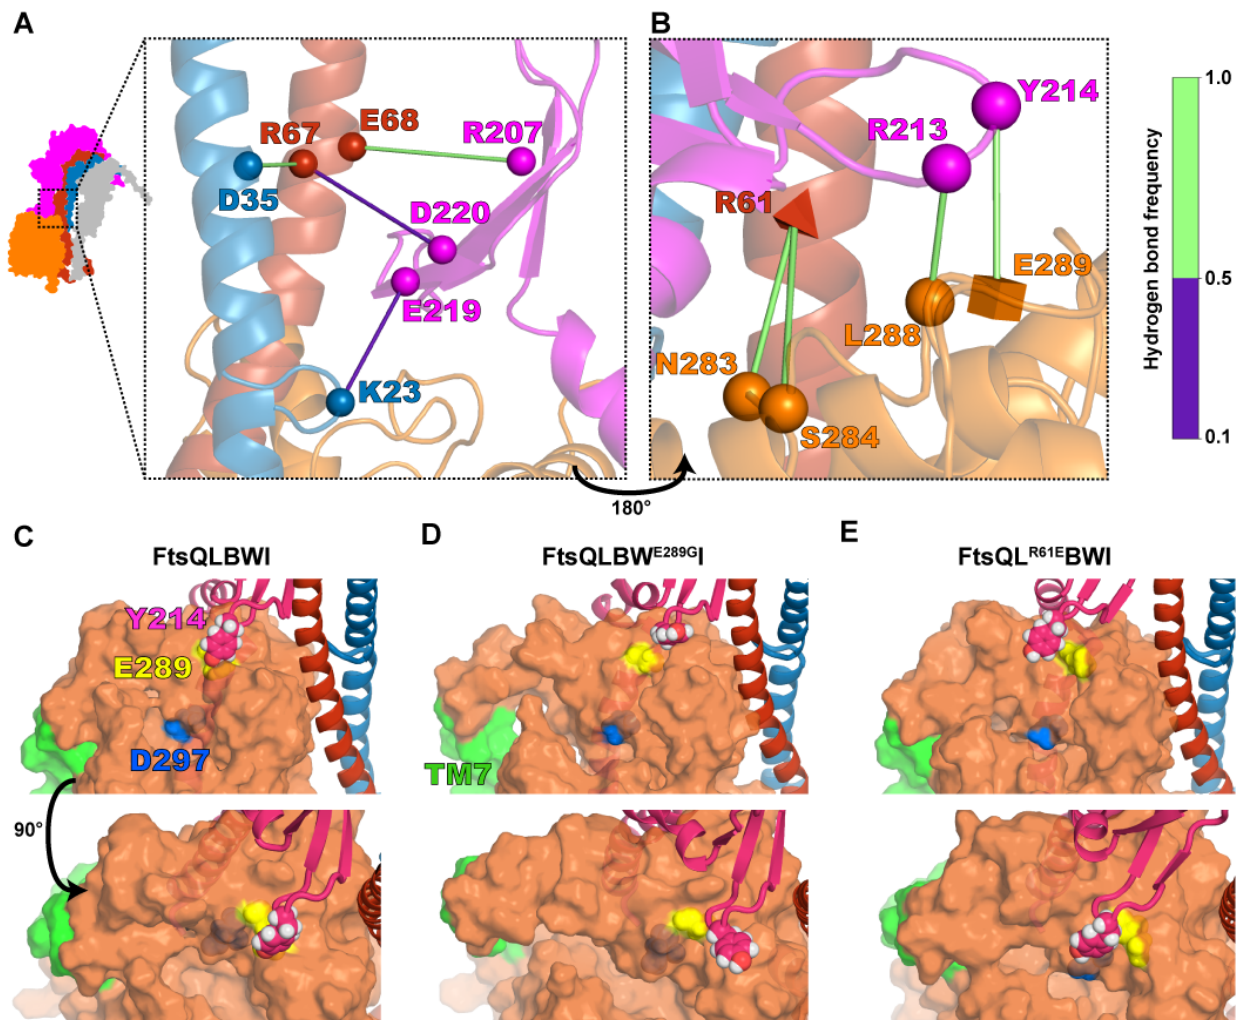

985

986 **Figure 4. Interactions between FtsB, FtsL, FtsI, and FtsW position the FtsI anchor-loop**  
 987 **near the FtsW active site; FtsI anchor-loop position is correlated with FtsWI activity. (A,**  
 988 **B) Hydrogen bonding in the Lid region. Shapes indicate residues with hydrogen bonding during**  
 989 **the last 500 ns of FtsQLBWI simulation, with a cube specifying SF mutation FtsI<sup>E289G</sup> and**  
 990 **tetrahedrons specifying DN mutation FtsL<sup>R61E</sup>. Hydrogen bonds occurring in between 10% and**  
 991 **50% of the last 500 ns of MD are distinguished from hydrogen bonds occurring over 50% of the**  
 992 **time (colorbar). Two views are shown with (A) showing interactions between the FtsI anchor**  
 993 **domain, FtsL, and FtsB that position the anchor domain and (B) rotated ~180° to show how**  
 994 **interactions between residues in ECL4 of FtsW with FtsL<sup>R61</sup>, FtsI<sup>R213</sup>, and FtsI<sup>Y214</sup> position ELC4**  
 995 **below the FtsI anchor-loop. (C-E) A cavity on the periplasmic face of FtsW containing the**  
 996 **putative catalytic residue FtsW<sup>D297</sup> (blue) and lying below the FtsW<sup>E289</sup> (yellow; D shows SF**

Britton and Yovanno *et al.* “Conformational changes in the essential *E. coli* septal cell wall synthesis complex suggest an activation mechanism”

997 FtsW<sup>E289G</sup>) is shown for the conformation of FtsQLBWI (**C**) and for complexes with FtsW<sup>E289G</sup> (**D**)  
998 or FtsL<sup>R61E</sup> (**E**) mutations following 1  $\mu$ s MD. With SF mutation FtsW<sup>E289G</sup>, the FtsI anchor-loop  
999 including FtsI<sup>Y214</sup> moves away from the cavity, which is expanded as FtsW TM7 (green) tilts into  
1000 the bilayer. With DN mutation FtsL<sup>R61E</sup>, the anchor-loop moves and FtsI<sup>Y214</sup> moves over the  
1001 cavity, which is stabilized by an interaction between FtsI<sup>R216</sup> and FtsW<sup>E289</sup>.  
1002 .

Britton and Yovanno *et al.* "Conformational changes in the essential *E. coli* septal cell wall synthesis complex suggest an activation mechanism"

1003 **Figure 5**

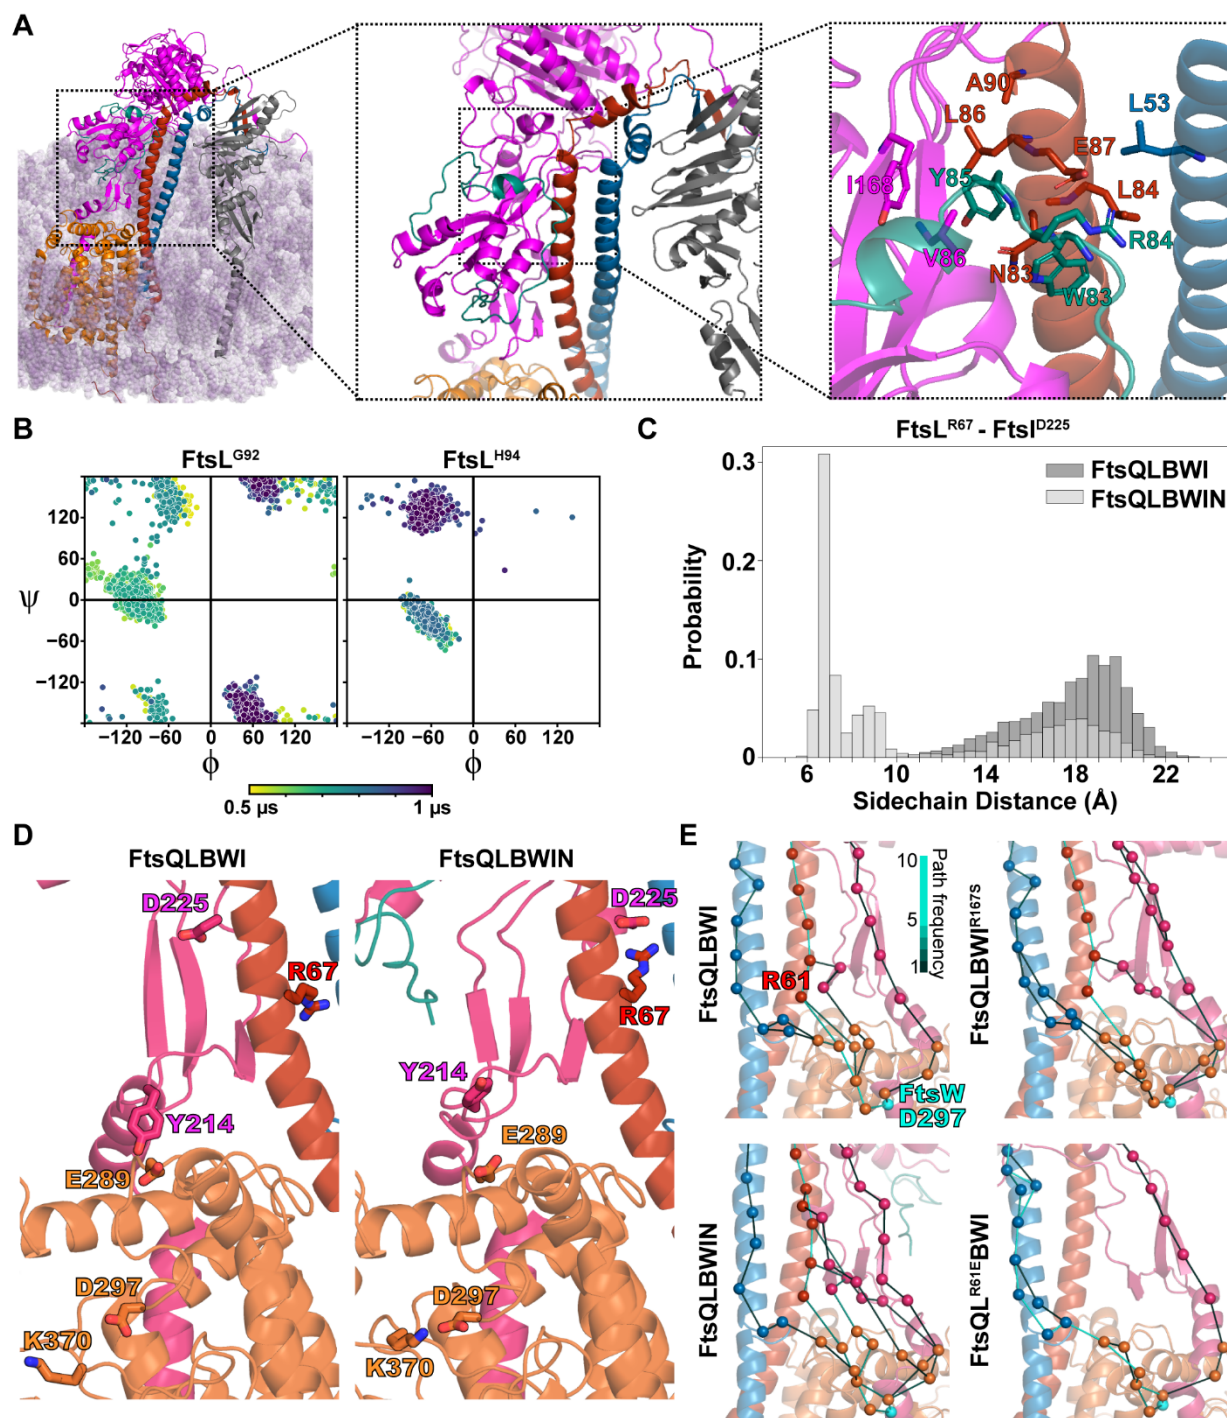

1004

1005 **Figure 5. FtsN<sup>E</sup> binding reduces inhibitory interactions and induces conformational**  
 1006 **changes observed in SF complexes. (A)** Position of FtsN<sup>E</sup> (teal) after 1  $\mu$ s MD of FtsQLBWIN.  
 1007 Essential residues of FtsN such as FtsN<sup>W83</sup> and FtsN<sup>Y85</sup> are found in the AWI interface in the  
 1008 Hub region. **(B)** Conformational change for FtsL<sup>G92</sup> and FtsL<sup>H94</sup> unwraps the initial  $\alpha$ -helical

Britton and Yovanno *et al.* “Conformational changes in the essential *E. coli* septal cell wall synthesis complex suggest an activation mechanism”

1009 conformation that was stable in FtsQLBWI, adopting  $\beta$ -strand-like, flexible backbone dihedral  
1010 angles for FtsL<sup>H94</sup> in the FtsQLBWIN simulation similar to those shown for SF mutant  
1011 FtsQLBWI<sup>R167S</sup> (**Fig. 3E**). **(C)** The distribution of distances between sidechain centers of  
1012 geometry for FtsL<sup>R67</sup> and FtsI<sup>D225</sup> is shown for the last 500 ns of FtsQLBWI and FtsQLBWIN  
1013 simulation. The decrease for FtsQLBWIN is associated with a conformational change in the last  
1014 300 ns of MD (trajectory in **Fig. S23**), supporting tighter packing between FtsI and FtsL in the  
1015 presence of FtsN. **(D)** Interaction between the FtsI anchor-loop residue FtsI<sup>Y214</sup> and FtsW<sup>E289</sup> is  
1016 disrupted for FtsQLBWIN as FtsI anchor domain association with FtsL is increased by  
1017 interaction between FtsI<sup>D225</sup> and FtsL<sup>R67</sup>. This moves the sidechain of FtsI<sup>Y214</sup> away from the  
1018 putative catalytic residue FtsW<sup>D297</sup>, similar to what was observed in the SF complex  
1019 FtsQLBW<sup>E289G</sup>I (**Fig. 4D**). Note that FtsW<sup>K370</sup> forms a salt bridge with FtsW<sup>D297</sup> in FtsQLBWIN,  
1020 but not FtsQLBWI. **(E)** Ensembles of optimal paths calculated from FtsQ to FtsW<sup>D297</sup> showing  
1021 the 10 most optimal paths in the final 500 ns of MD for FtsQLBWI, FtsQLBWI<sup>R167S</sup>, FtsQLBWIN,  
1022 and FtsQL<sup>R61E</sup>BWI. Line colors correspond to the number of paths connecting pairs of residues  
1023 in the ensemble. The DN variant FtsL<sup>R61E</sup> eliminated all direct paths between FtsL to FtsW,  
1024 shifting to paths through a small loop extending from the FtsB helix. Addition of FtsN<sup>E</sup> increased  
1025 the density of paths through FtsI, which also includes paths through the Pivot region.

1026

1027

1028
